# Supplementary material
Source: publisher figshare collection journal article supplement (https://acs.figshare.com/ndownloader/files/25891537)
Supplement: Supplementary file 1 [file 25891537]

## Supporting Information

### On-DNA Palladium-catalyzed hydrogenation like reaction suitable for DNA-Encoded library synthesis

Julián Priego,<sup>‡</sup> Eduardo de Pedro Beato,<sup>†</sup> Jesús Benavides,<sup>†</sup> Adrián Girona-Martinez,<sup>†</sup> Fernando González,<sup>†</sup> Jesús Blas, María Dolores Martín-Ortega, Ramón Rama-Garda, Jesús Ezquerro,<sup>†</sup> Miguel A. Toledo, Alicia Torrado\*,<sup>‡</sup>

Centro de Investigación Lilly, S. A., 28108 Alcobendas, Madrid, Spain.

E-mail: [TORRADO\\_ALICIA@LILLY.COM](mailto:TORRADO_ALICIA@LILLY.COM)

### Table of Contents

|      |                                                                                                                                                                                                                                                |       |
|------|------------------------------------------------------------------------------------------------------------------------------------------------------------------------------------------------------------------------------------------------|-------|
| I    | Materials and Analytical methods                                                                                                                                                                                                               | 2     |
| II   | Structure of DNA <b>AOP-HP-NH2</b> and <b>AOP-HP-Primer-NH2</b>                                                                                                                                                                                | 3     |
| III  | Synthesis and LCMS of DNA conjugates <b>SC1</b> to <b>SC37</b>                                                                                                                                                                                 | 4-17  |
| IV   | General procedure for deprotection of DNA- <i>N</i> -Cbz, <i>N</i> -Alloc, <i>N</i> -Allyl, O-Bn and O-Allyl and hydrogenation of DNA-NH-triple bonds, double bonds, azide and nitro derivatives and representative LCMS <b>1</b> to <b>37</b> | 18-34 |
| V    | General procedure for 3-cycle library dummy synthesis and representative LCMS of intermediates <b>38</b> to <b>42</b>                                                                                                                          | 35-40 |
| VI   | DNA Damage Evaluation: Assessment of DNA degradation using Quantitative PCR                                                                                                                                                                    | 41-42 |
| VII  | Azide reduction methods comparison                                                                                                                                                                                                             | 43    |
| VIII | Nitro reduction methods comparison                                                                                                                                                                                                             | 44-45 |
| IX   | <i>N</i> -Alloc deprotection methods comparison                                                                                                                                                                                                | 46    |
| X    | <i>N</i> -Cbz deprotection methods comparison                                                                                                                                                                                                  | 47    |

## I. Materials and Analytical methods

All the reagents were purchased through vendors. They were dissolved in an appropriate solvent before use. On-DNA reactions conducted during validation were analyzed by HPLC/ESI-MS. After reaction, an aliquot of the reaction mixture solution was diluted (typically 1  $\mu\text{L}$  aliquot was diluted in 10  $\mu\text{L}$  of water). Samples were then injected onto a reverse-phase chromatography column (XBridge C18, 3.5  $\mu\text{m}$ , 2.1x50 mm) and eluted with a mixture of Solvent A (10 mM TEAA in  $\text{H}_2\text{O}$  at pH=7) and Solvent B ( $\text{CH}_3\text{CN}$ ). Yields were calculated by examination of the UV (260 nm) and TIC traces of the LCMS chromatograms. Samples with  $\text{MW}>12000$  D were analyzed by Quadrupole Time-of-flight Mass Spectrometry (QTOF). After reaction, an aliquot of the reaction mixture solution was diluted (typically 1  $\mu\text{L}$  aliquot was diluted in 10  $\mu\text{L}$  of a saturated solution of EDTA in water). Samples were then injected onto a reverse-phase chromatography column (DNAPac RP Column, 4 mm, 3.0x50 mm) and eluted with a mixture of Solvent A (15 mM DBA/25 mM HFIP in  $\text{H}_2\text{O}$  at pH=9.8) and Solvent B ( $\text{CH}_3\text{CN}$ ). Mass was obtained after deconvolution with Agilent Mass Hunter Qualitative Analysis.

## II. Structure of DNA headpieces

**AOP-HP-Primer-NH2:** DNA headpiece-NH2 (HP-NH2) was obtained from Biosearch Technologies. The amine of this HP was further extended by an additional 16 atoms by reacting it with Fmoc-15-amino-4,7,10,13-tetraoxapentadecanoic acid (**AOP**) followed by treatment with piperidine to remove the Fmoc protecting group. Following ethanol precipitation and isolation, this material was then reconstituted in water to continue the synthesis. The structure of the HP and detailed experimental procedure followed to get **AOP-HP-NH2** (Figure S1) was described previously by Clark et al.<sup>1</sup> **AOP-HP-NH2** was elongated via ligation with a primer to get **AOP-HP-Primer-NH2** (Figure S2). This AOP-Headpiece-Primer-NH2 (**AOP-HP-Primer-NH2**) served as the starting material for scaffolds **SC1** to **SC36** described in the paper.

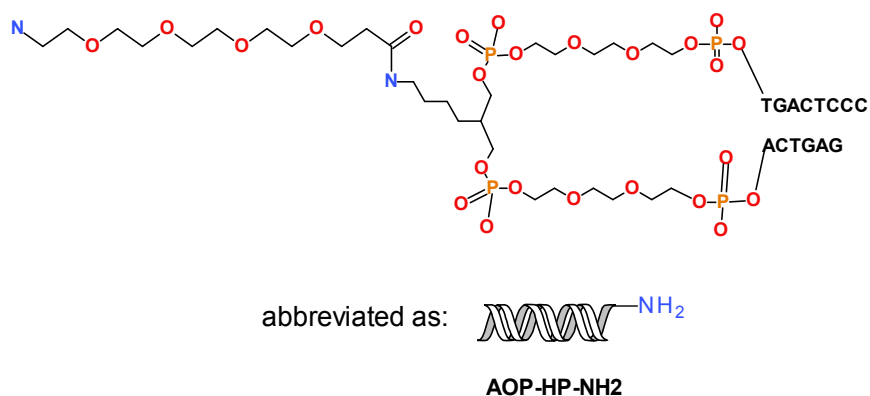

**Figure S1.** Sequence and structure of the “**AOP-HP-NH2**”. MW= 5184 D

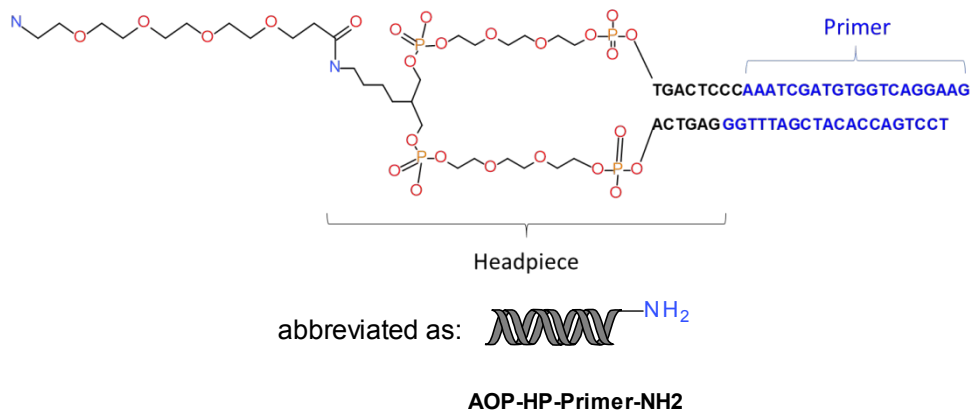

**Figure S2.** Sequence and structure of the “**AOP-HP-Primer-NH2**”. MW= 17606 D

<sup>1</sup> Clark, M. A.; Acharya, R. A.; Arico-Muendel, C. C.; Belyanskaya, S. L.; Benjamin, D. R.; Carlson, N. R.; Centrella, P. A.; Chiu, C. H.; Creaser, S. P.; Cuzzo, J. W.; Davie, C. F.; Ding, Y.; Franklin, G. J.; Franzen, K. D.; Geftter, M. L.; Hale, S. P.; Hansen, N. J. V.; Israel, D. I.; Jiang, J.; Kavarana, M. J.; Kelley, M. S.; Kollmann, C. D.; Li, F.; Lind, K.; Mataruse, S.; Medeiros, P. F.; Messer, J. A.; Myers, P.; O’Keefe, H.; Oliff, M. C.; Rise, C. E.; Satz, A. L.; Skinner, S. R.; Svendsen, J. L.; Tang, L.; van Vloten, K.; Wagner, R. W.; Yao, G.; Morgan, B. A. Design, synthesis and selection of DNA-encoded small-molecule libraries. *Nat. Chem. Biol.* **2009**, 5, 647-654.

### III. Synthesis and LCMS of DNA SM SC1 to SC36

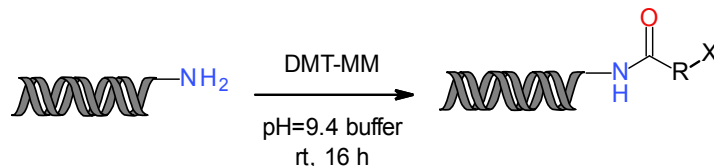

**Figure S3:** AOP-HP-Primer-NH-CO-X (X = *N*-Cbz, *N*-Alloc, *N*-Allyl, O-Bn, O-Allyl groups, alkene, alkyne, azide and nitro groups) preparation by amide chemistry promoted by DMT-MM.

#### General preparation of SC1 to SC36: Acylation with DMT-MM

To a solution of **AOP-HP-Primer-NH<sub>2</sub>** (for **SC1** to **SC36**) in borate buffer 0.5 M pH 9.4 (1000 nmol, 1mL) were added 40 equivalents of the corresponding carboxylic acid (stock solution, 400 mM in DMA, 40000 nmol), followed by 40 equivalents of DMT-MM (stock solution, 400 mM in water, 40000 nmol). The reaction mixture was allowed to proceed at room temperature with stirring overnight. The reaction was precipitated by addition of 10% volume stock solution of 5 M NaCl in water and 3 times volume of cold EtOH. The mixture was kept in the freezer for 1 h and then it was centrifuged for 45 min. The supernatant was discarded and the residue was dried under N<sub>2</sub> at 37 °C. The pellet was re-dissolved (14 mL water) and charged in one YM3K centrifugal tube (Amicon) and centrifuged at 4000 rpm for 30 min. The sample was collected and its concentration was measured by Nanodrop.

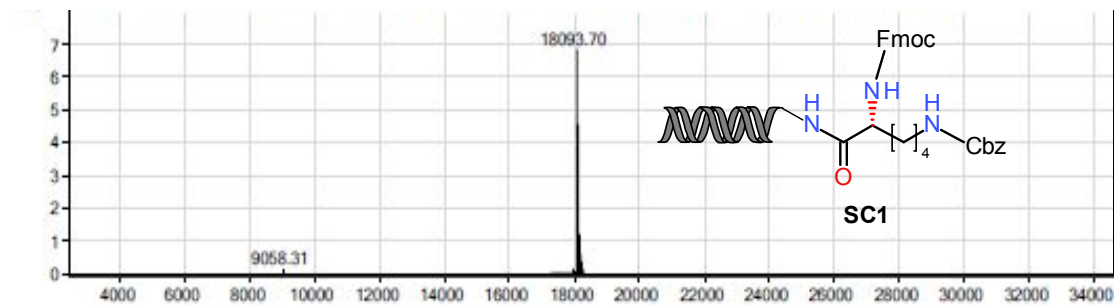

**Figure S4:** Deconvoluted mass spectrum of compound **SC1**, expected: 18090; observed: 18093

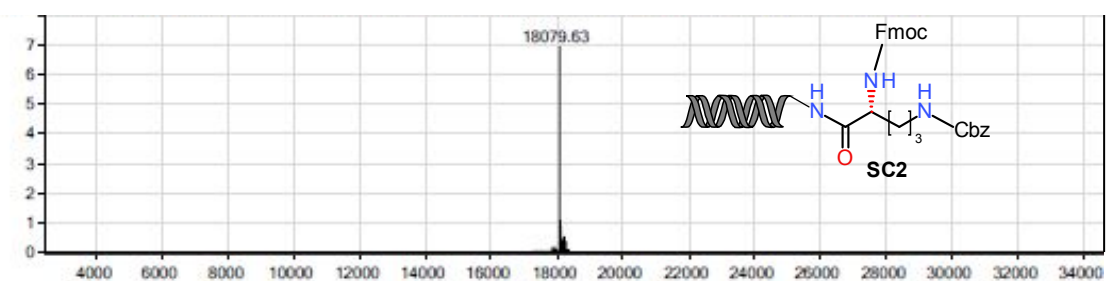

**Figure S5:** Deconvoluted mass spectrum of compound **SC2**, expected: 18076; observed: 18079

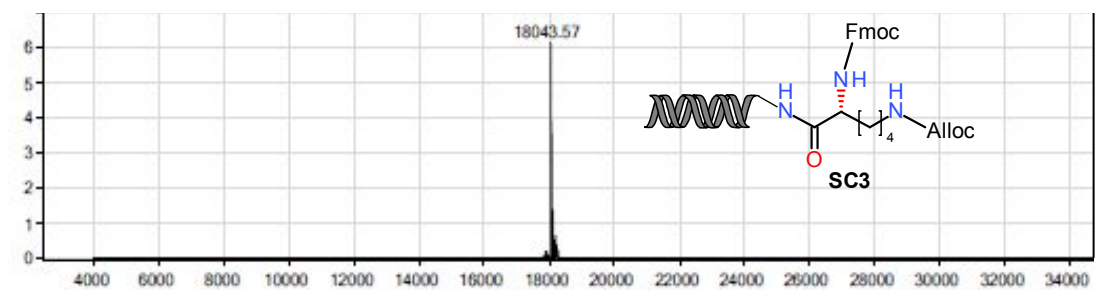

**Figure S6:** Deconvoluted mass spectrum of compound **SC3**, expected: 18040; observed: 18043

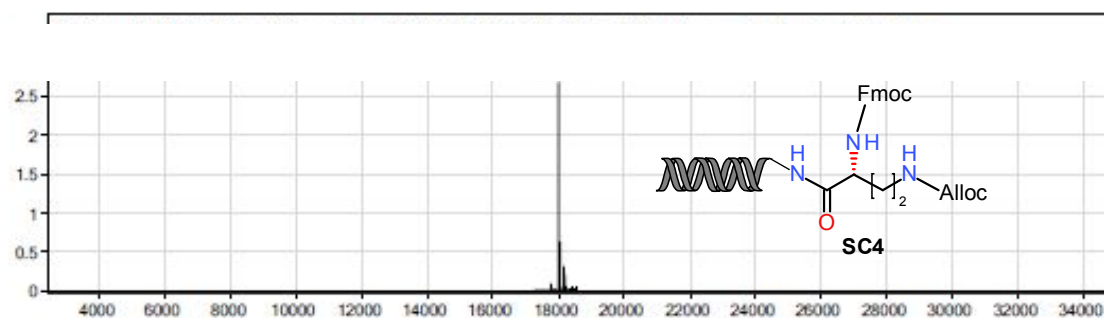

**Figure S7:** Deconvoluted mass spectrum of compound **SC4**, expected: 18012; observed: 18015

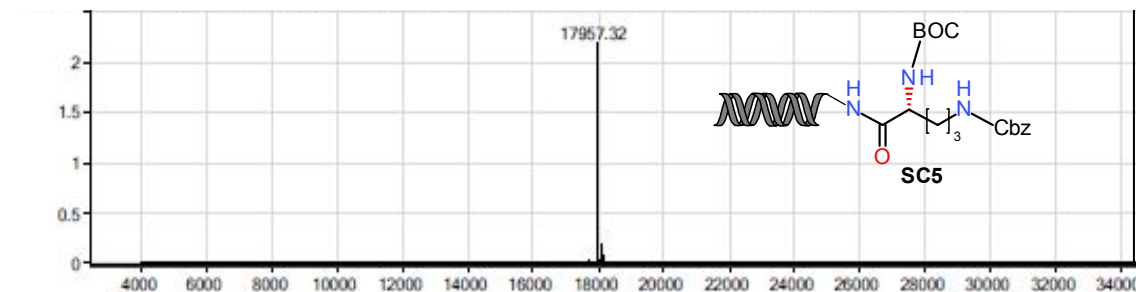

**Figure S8:** Deconvoluted mass spectrum of compound **SC5**, expected: 17954; observed: 17957

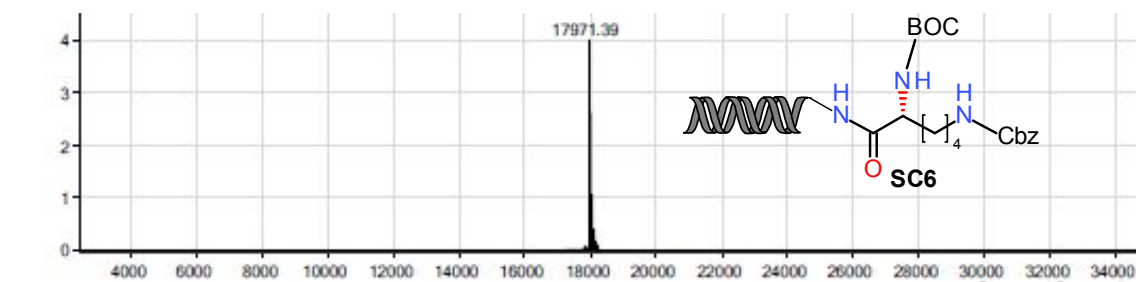

**Figure S9:** Deconvoluted mass spectrum of compound **SC6**, expected: 17968; observed: 17971

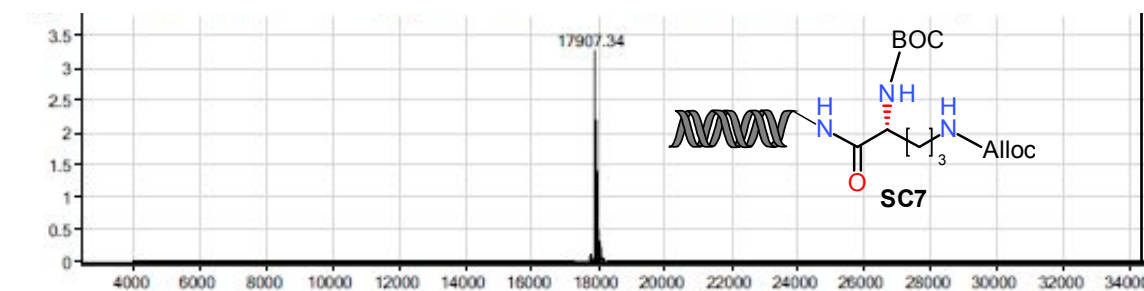

**Figure S10:** Deconvoluted mass spectrum of compound **SC7**, expected: 17904; observed: 17907

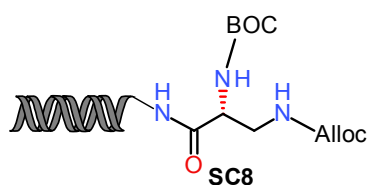

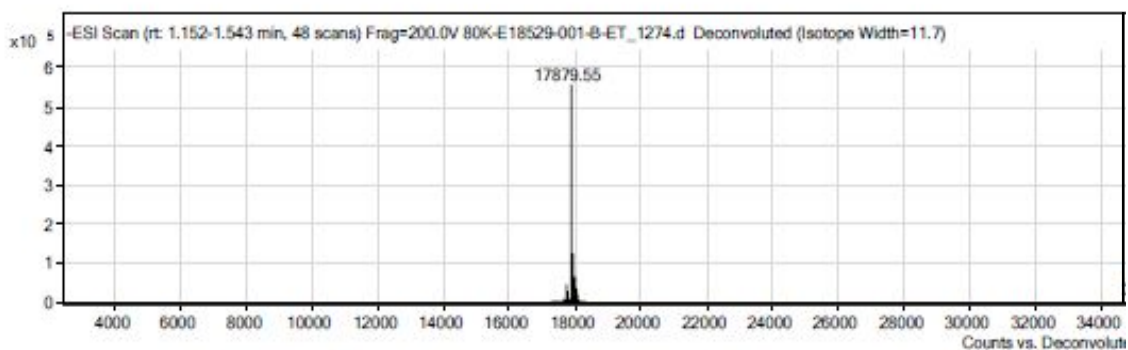

**Figure S11:** Deconvoluted mass spectrum of compound **SC8**, expected: 17876; observed: 17879

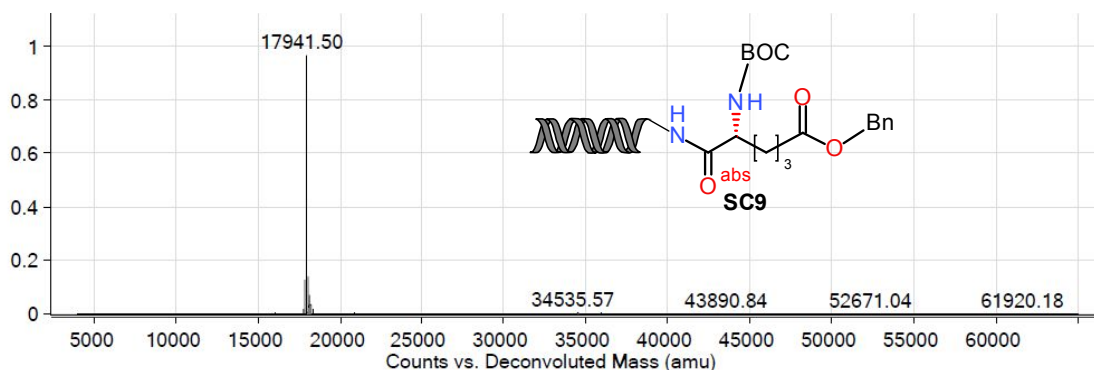

**Figure S12:** Deconvoluted mass spectrum of compound **SC9**, expected: 17939; observed: 17941

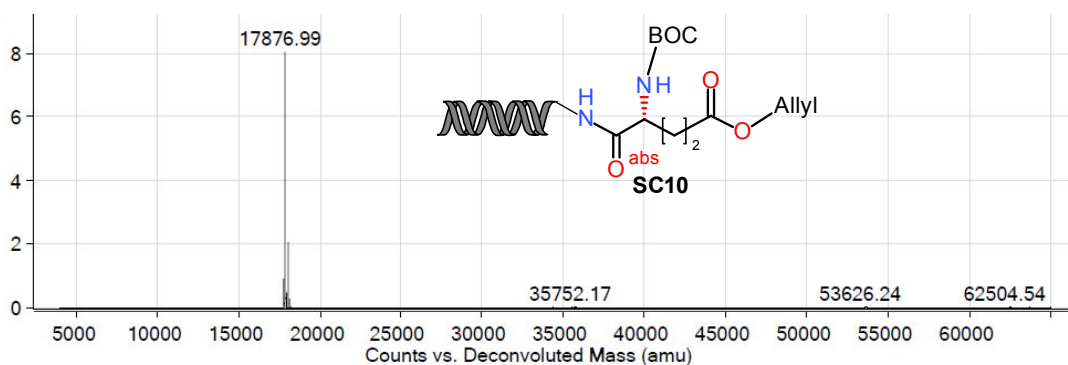

**Figure S13:** Deconvoluted mass spectrum of compound **SC10**, expected: 17875; observed: 17876

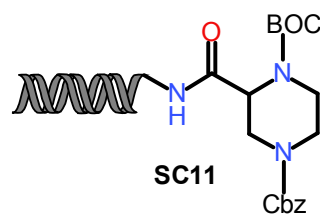

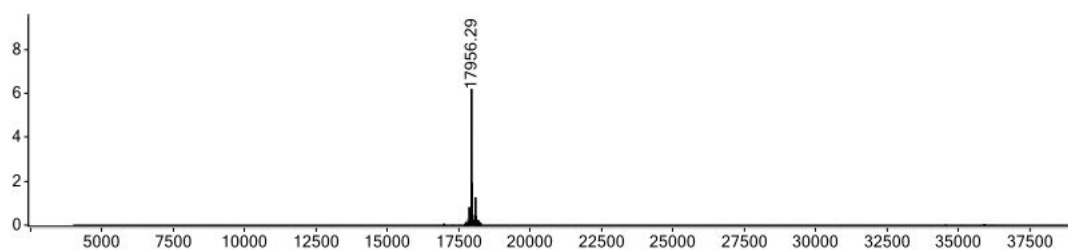

**Figure S14:** Deconvoluted mass spectrum of compound **SC11**, expected: 17953; observed: 17956

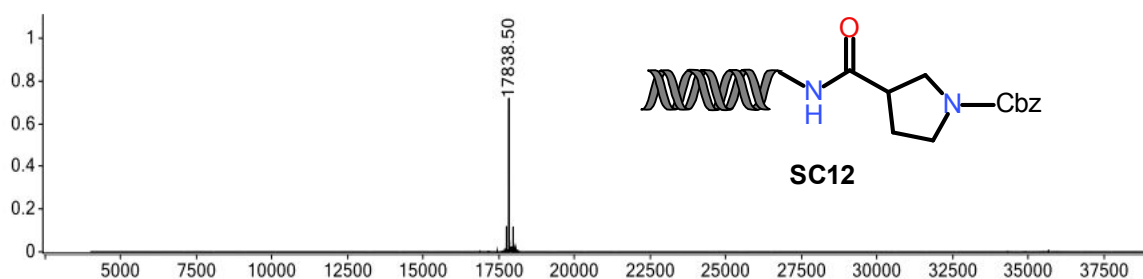

**Figure S15:** Deconvoluted mass spectrum of compound **SC12**, expected: 17837; observed: 17838

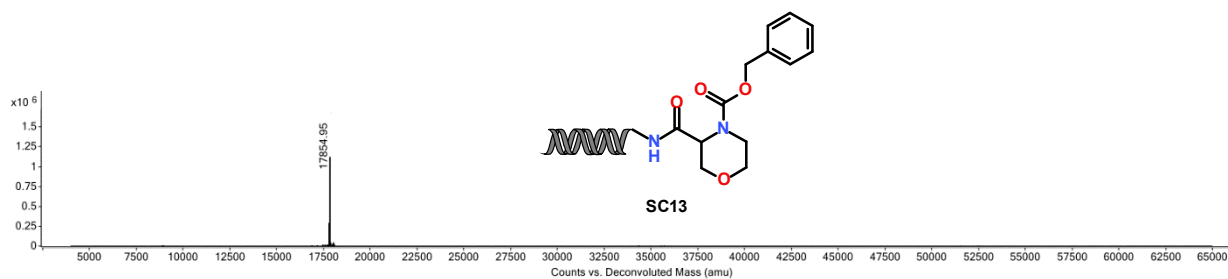

**Figure S16:** Deconvoluted mass spectrum of compound **SC13**, expected: 17853; observed: 17854

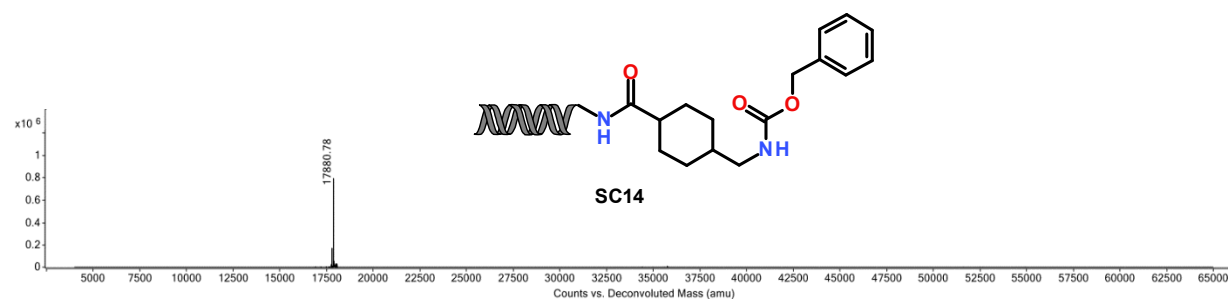



**Figure S17:** Deconvoluted mass spectrum of compound **SC14**, expected: 17879; observed: 17880

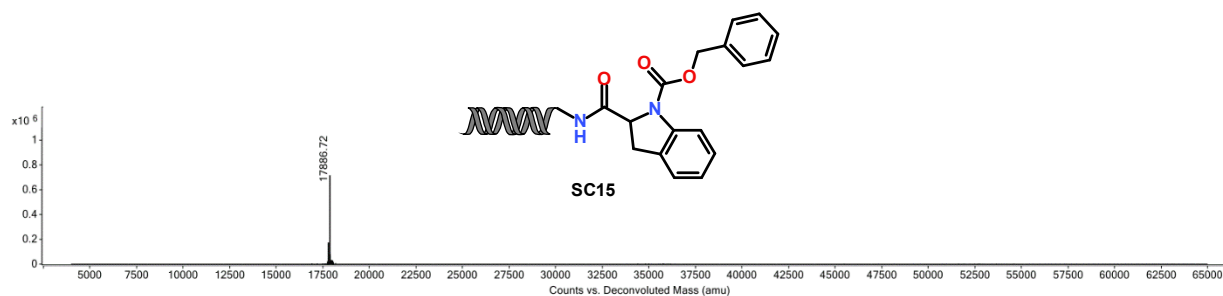

**Figure S18:** Deconvoluted mass spectrum of compound **SC15**, expected: 17885; observed: 17886

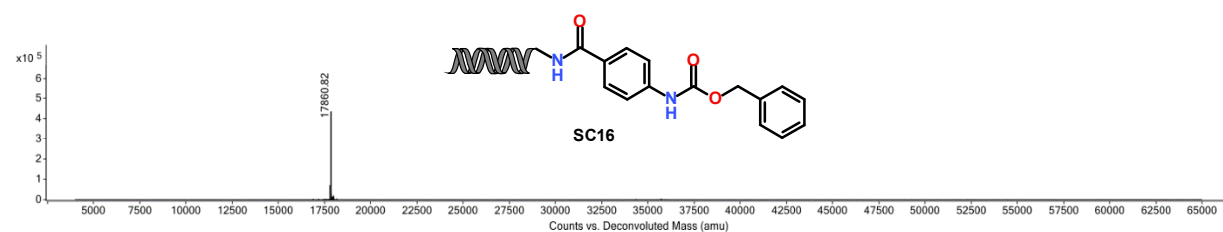

**Figure S19:** Deconvoluted mass spectrum of compound **SC16**, expected: 17859; observed: 17860

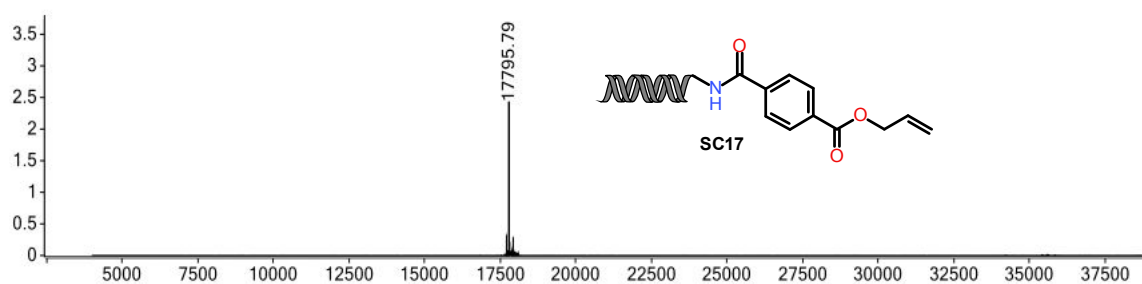

**Figure S20:** Deconvoluted mass spectrum of compound **SC17**, expected: 17794; observed: 17795

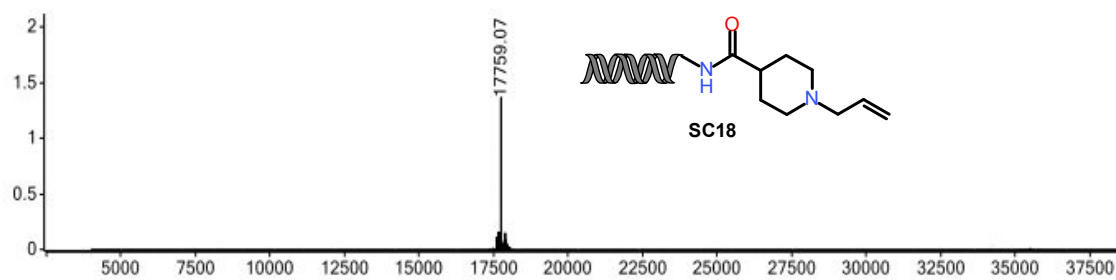

**Figure S21:** Deconvoluted mass spectrum of compound **SC18**, expected: 17757; observed: 17759

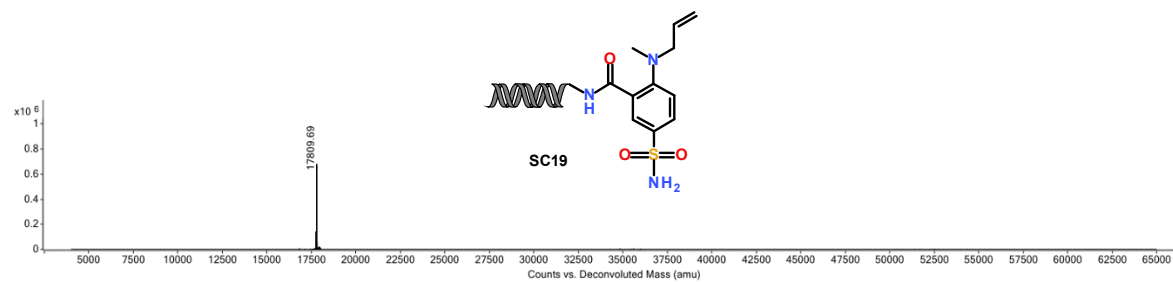

**Figure S22:** Deconvoluted mass spectrum of compound **SC19**, expected: 17808; observed: 17809

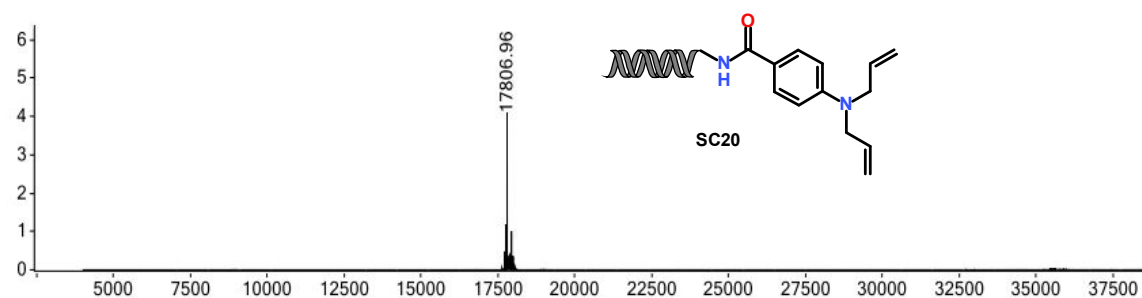

**Figure S23:** Deconvoluted mass spectrum of compound **SC20**, expected: 17805; observed: 17806

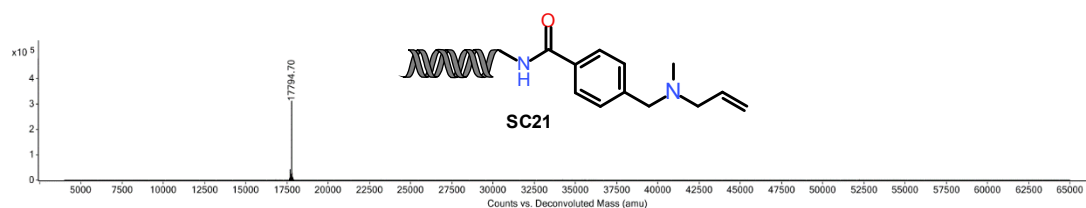

**Figure S24:** Deconvoluted mass spectrum of compound **SC21**, expected: 17793; observed: 17794

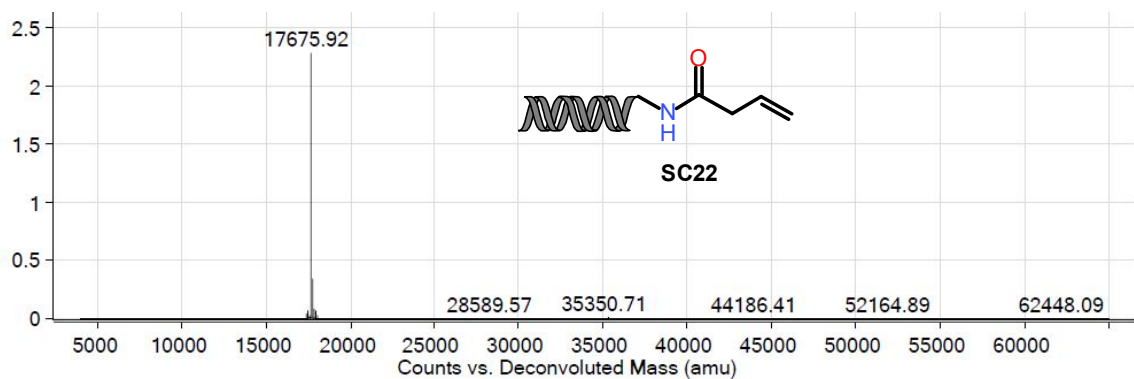

**Figure S25:** Deconvoluted mass spectrum of compound **SC22**, expected: 17674; observed: 17675

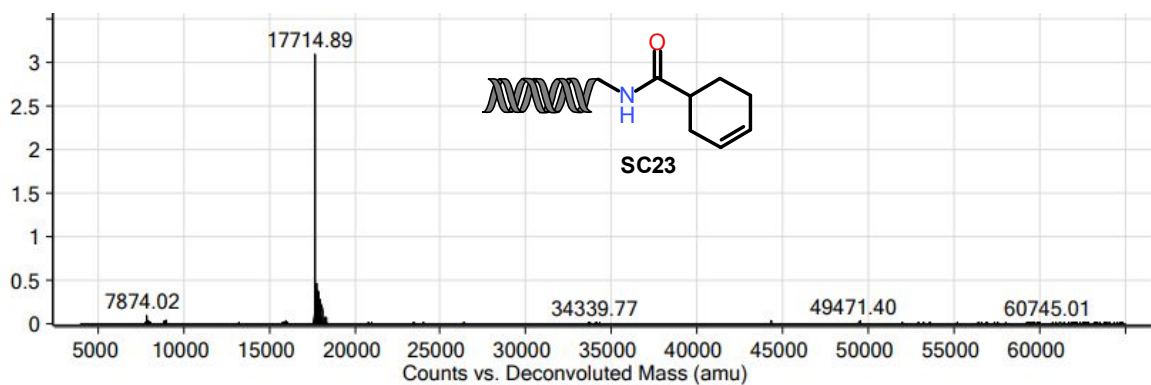

**Figure S26:** Deconvoluted mass spectrum of compound **SC23**, expected: 17714; observed: 17714

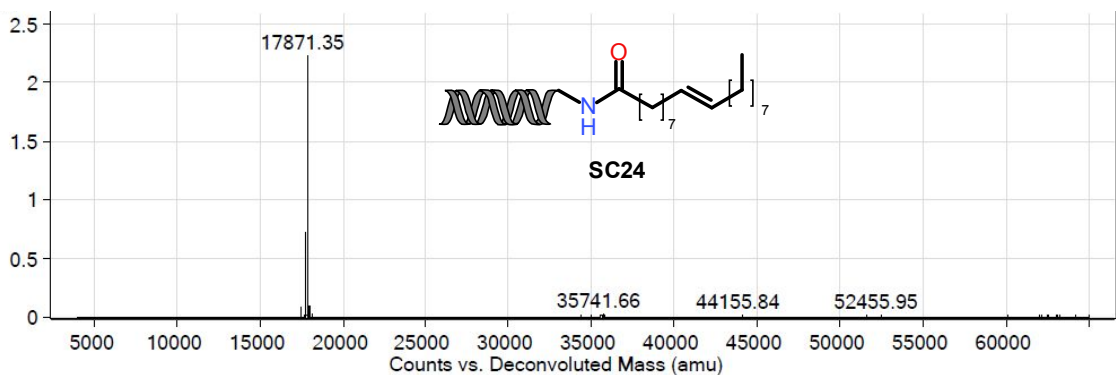

**Figure S27:** Deconvoluted mass spectrum of compound **SC24**, expected: 17870; observed: 17871

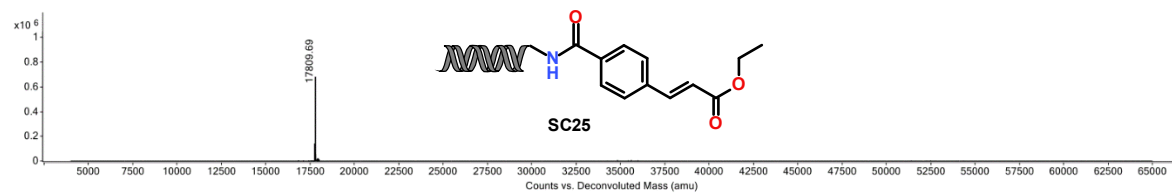

**Figure S28:** Deconvoluted mass spectrum of compound **SC25**, expected: 17808; observed: 17809

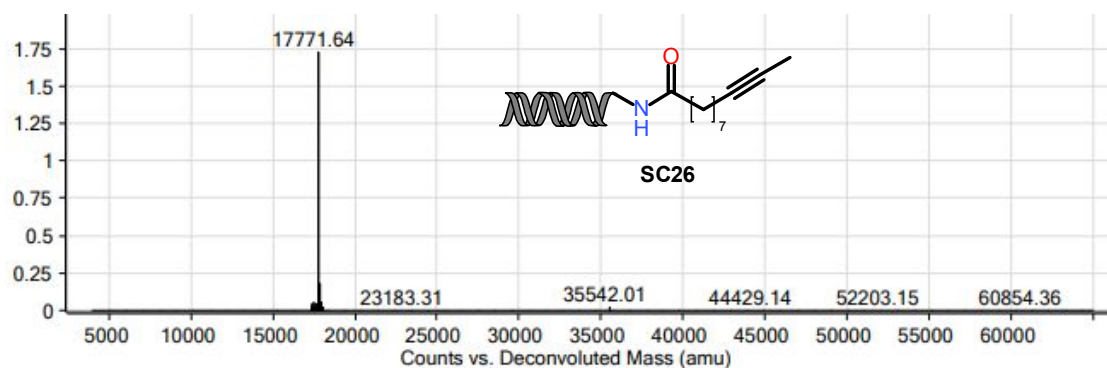

**Figure S29:** Deconvoluted mass spectrum of compound **SC26**, expected: 17770; observed: 17771

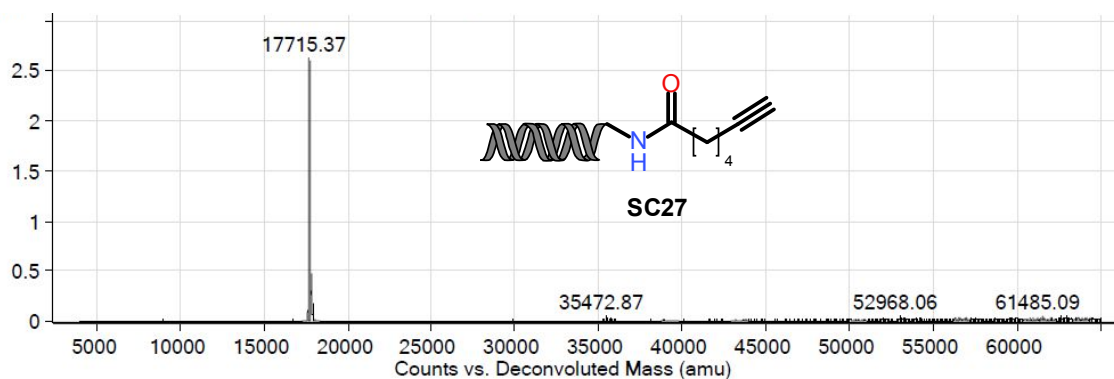

**Figure S30:** Deconvoluted mass spectrum of compound **SC27**, expected: 17714; observed: 17715

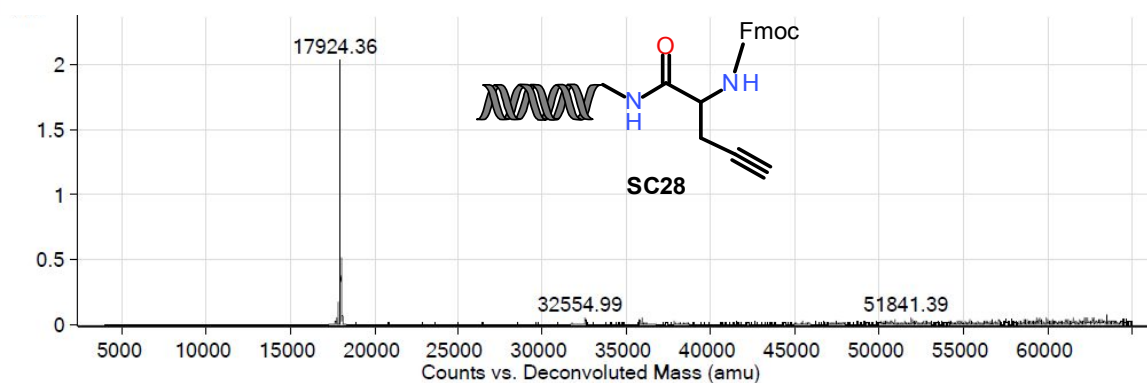

**Figure S31:** Deconvoluted mass spectrum of compound **SC28**, expected: 17923; observed: 17924

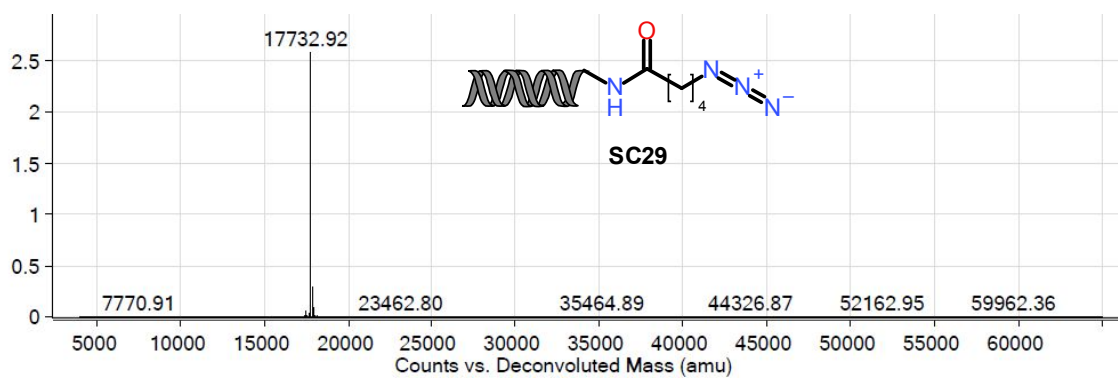

**Figure S32:** Deconvoluted mass spectrum of compound **SC29**, expected: 17731; observed: 17732

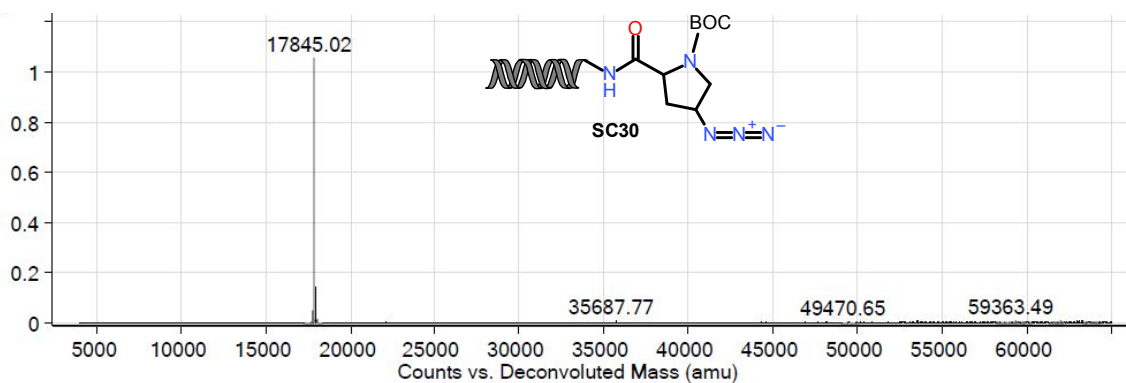

**Figure S33:** Deconvoluted mass spectrum of compound **SC30**, expected: 17844; observed: 17845

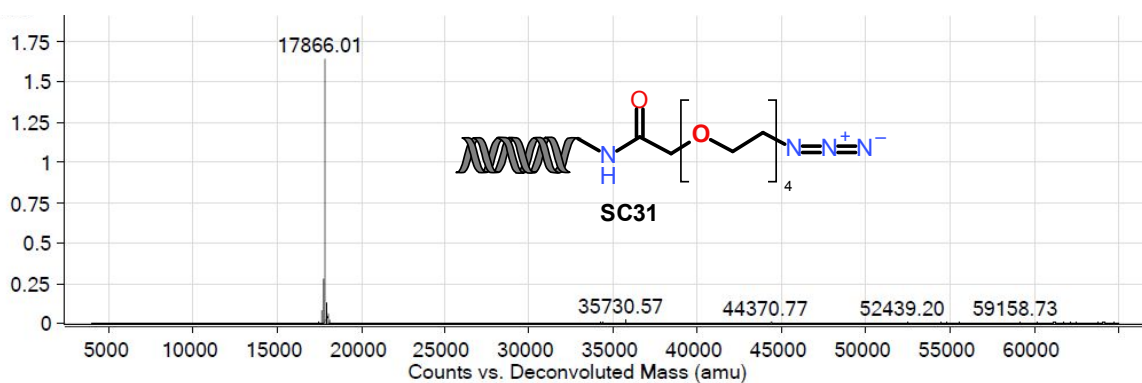

**Figure S34:** Deconvoluted mass spectrum of compound **SC31**, expected: 17865; observed: 17866

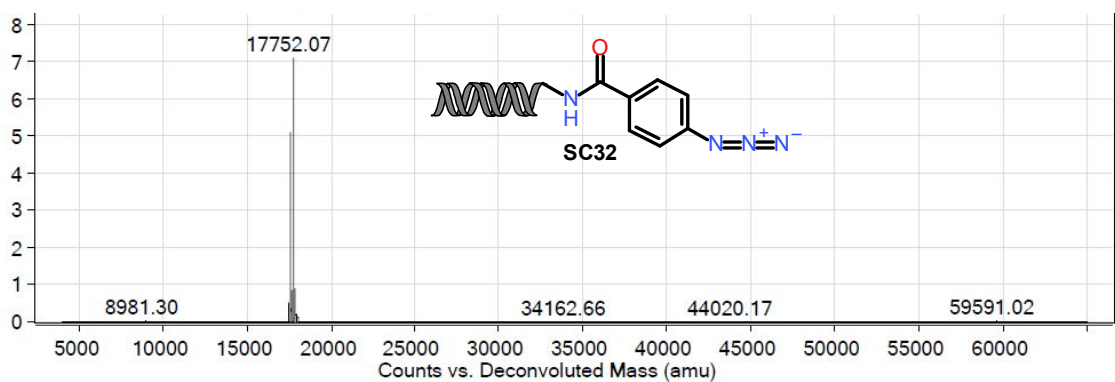

**Figure S35:** Deconvoluted mass spectrum of compound **SC32**, expected: 17751; observed: 17752

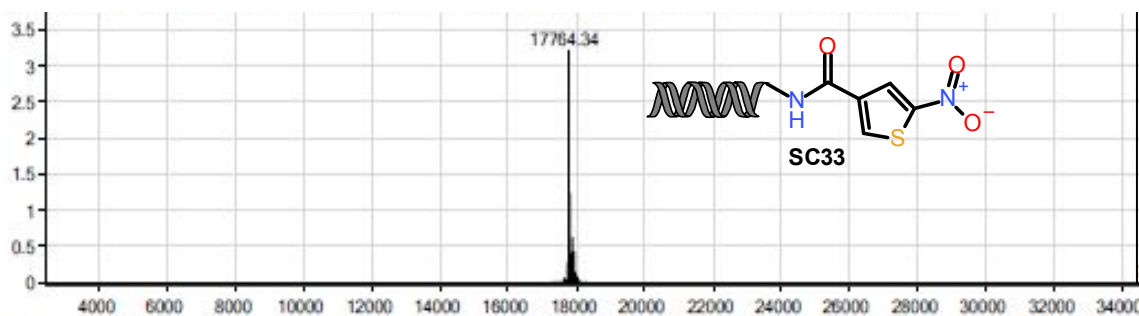

**Figure S36:** Deconvoluted mass spectrum of compound **SC33**, expected: 17761; observed: 17764

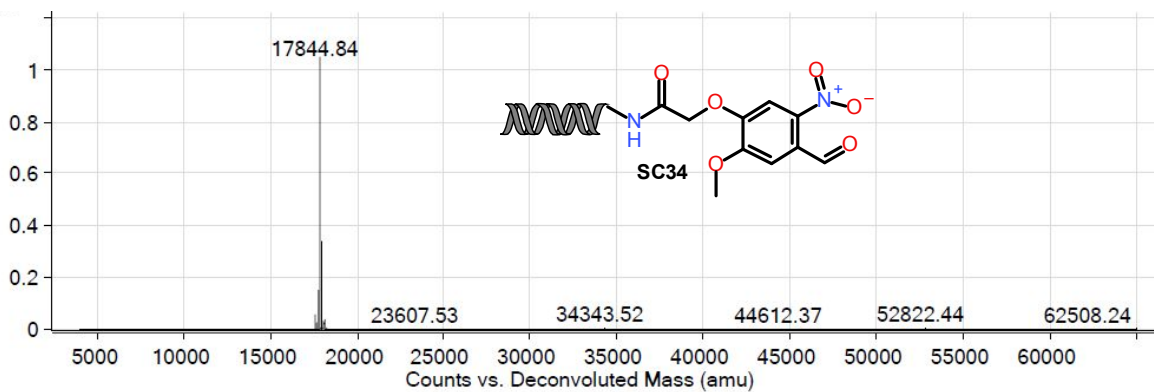

**Figure S37:** Deconvoluted mass spectrum of compound **SC34**, expected: 17843; observed: 17844

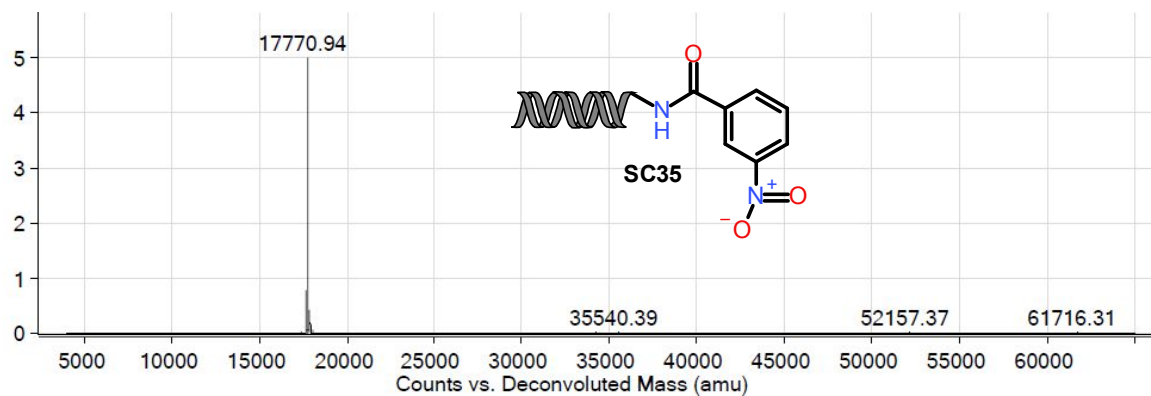

**Figure S38:** Deconvoluted mass spectrum of compound **SC35**, expected: 17769; observed: 17770



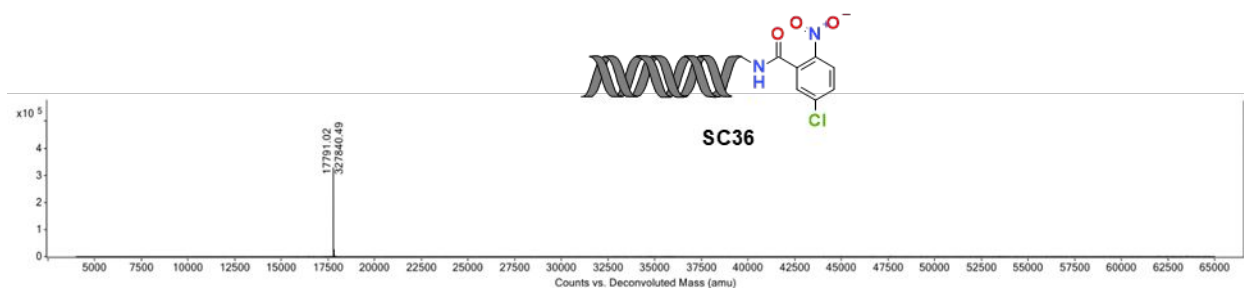

**Figure S39:** Deconvoluted mass spectrum of compound **SC36**, expected: 17790; observed: 17791

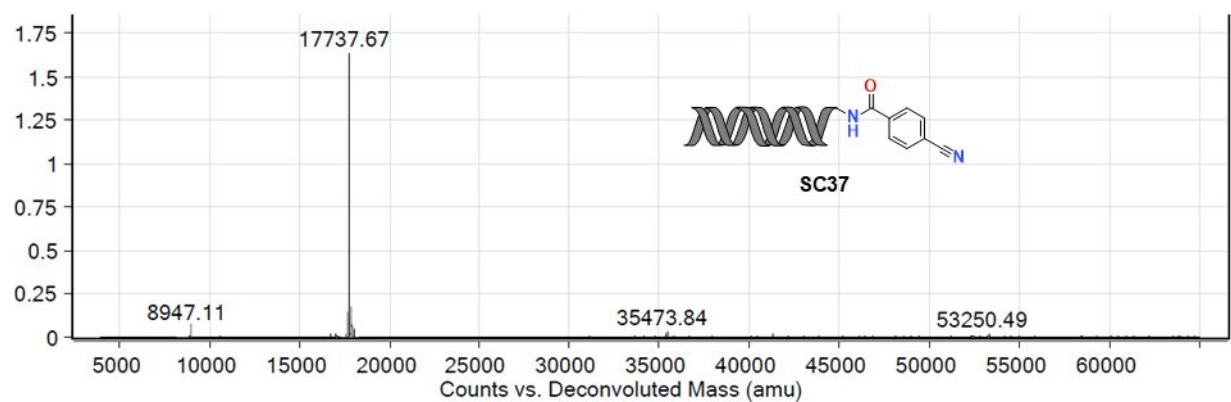

**Figure S40:** Deconvoluted mass spectrum of compound **SC37**, expected: 17735; observed: 17737

#### IV. General procedure for deprotection and reduction of DNA-*N*-Cbz, *N*-Alloc, *N*-Allyl, O-Bn and O-Allyl and representative LCMS

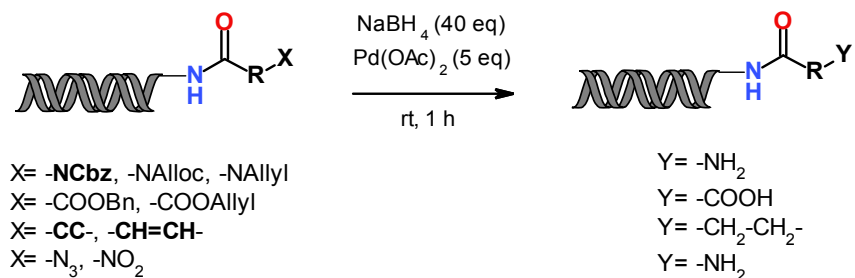

**Figure S41:** AOP-HP-Primer-NH-CO-R-X (X = *N*-Cbz, *N*-Alloc, *N*-Allyl, O-Bn, O-Allyl groups, alkene, alkyne, azide and nitro groups) deprotection/reduction promoted by Pd(OAc)<sub>2</sub>/NaBH<sub>4</sub>.

To a 1 mM solution of DNA-derivative (for **SC1** to **SC36**) in water (20 nmol, 20  $\mu$ L) were added 40 equivalents of sodium borohydride (2  $\mu$ L, 400 mM in NMP) and 5 equivalents of palladium acetate (2  $\mu$ L, 50 mM in DMA). The reaction was shaken at rt for 1h and then it was treating with a L-Cysteine (20  $\mu$ L, 300 mM in water).

Adding L-Cysteine (Pd scavenger) was necessary before running LC/MS; otherwise, the MS signal was messy. The following treatment could be applied for the Pd removal.

##### L-Cysteine treatment<sup>2</sup>

To the reaction (containing 20 nmol of **SC#**), 300 equivalents of a stock solution of L-cysteine (3000 nmols, 300 mM in water, 20  $\mu$ L) were added. The suspension was left stirring at room temperature for 4 hours. In some cases, when it was left too much time, L-cysteine can make S-S bonds and precipitate, in those cases centrifugation and collection of the supernatant was carried out. The DNA was then precipitated by addition of 10% volume stock solution of 5 M NaCl in water and 3 times volume of cold EtOH. The mixture was kept in the freezer for 1 h and then it was centrifuged for 45 min. The supernatant was discarded and the residue was dried under N<sub>2</sub> at 37 °C.

<sup>2</sup> Barbaras, D.; Broziu, J.; Johannsen, I.; Allmendinger, T. Removal of Heavy Metals from Organic Reaction Mixtures: Preparation and Application of Functionalized Resins. *Org. Process Res. Dev.* **2009**, *13*, 1068-1079.

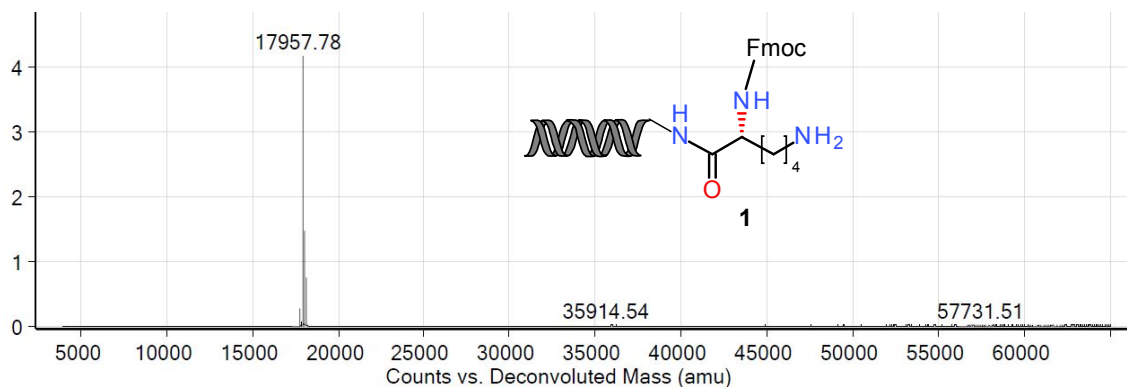

**Figure S42:** Deconvoluted mass spectrum of compound **1**, expected: 17955; observed: 17957

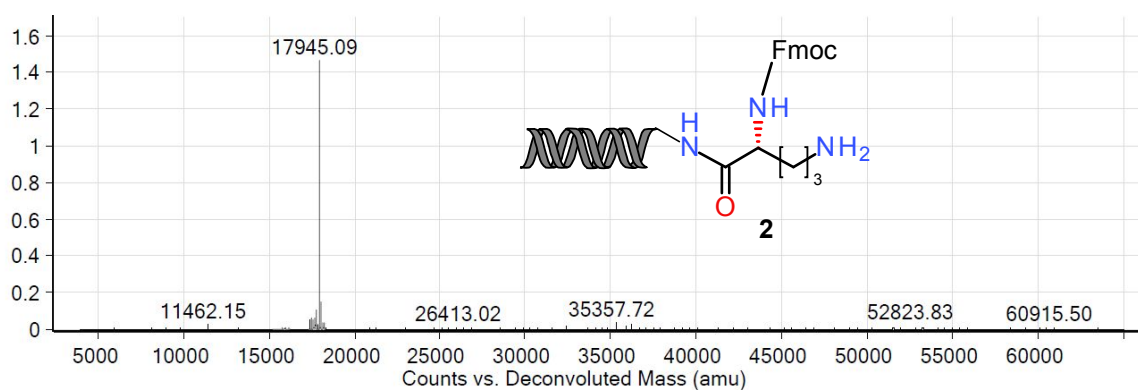

**Figure S43:** Deconvoluted mass spectrum of compound **2**, expected: 17941; observed: 17945

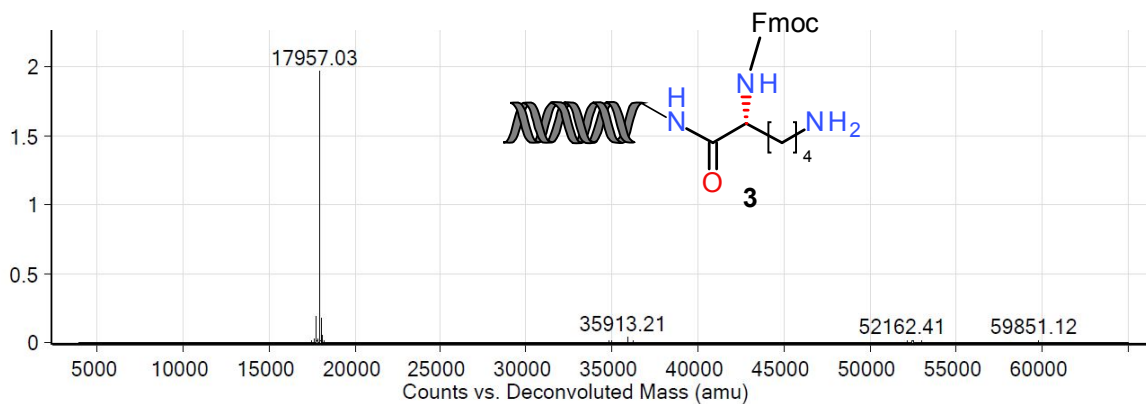

**Figure S44:** Deconvoluted mass spectrum of compound **3**, expected: 17956; observed: 17957

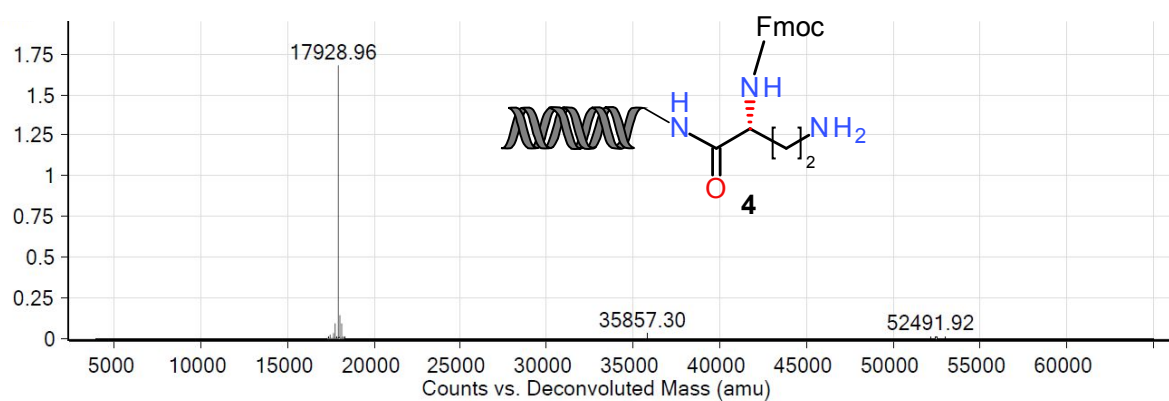

**Figure S45:** Deconvoluted mass spectrum of compound **4**, expected: 17928; observed: 17928

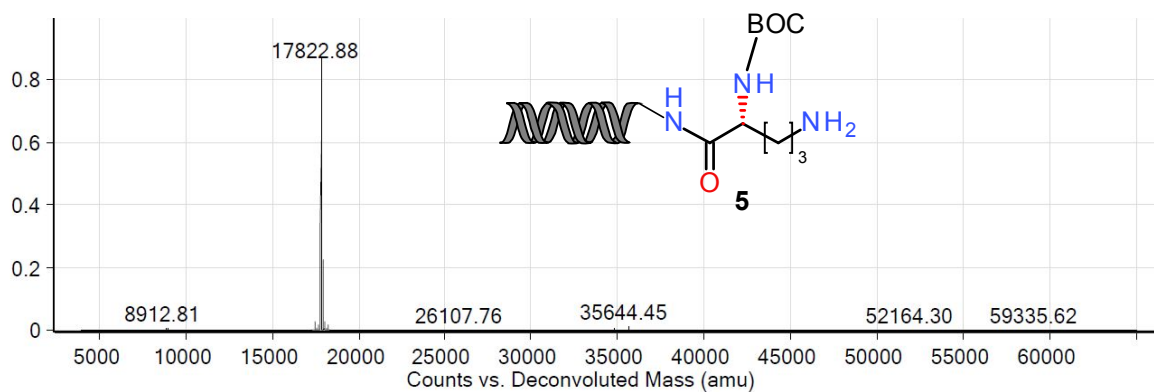

**Figure S46:** Deconvoluted mass spectrum of compound **5**, expected: 17820; observed: 17822

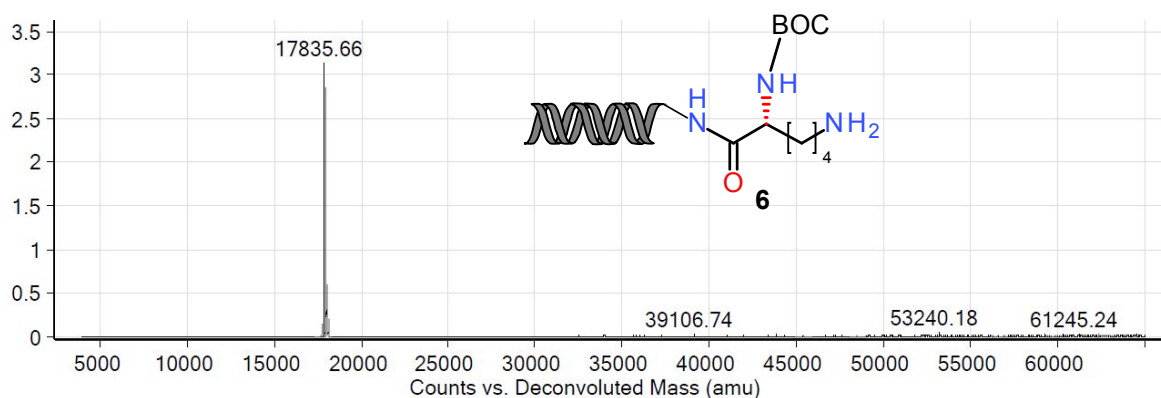

**Figure S47:** Deconvoluted mass spectrum of compound **6**, expected: 17833; observed: 17835

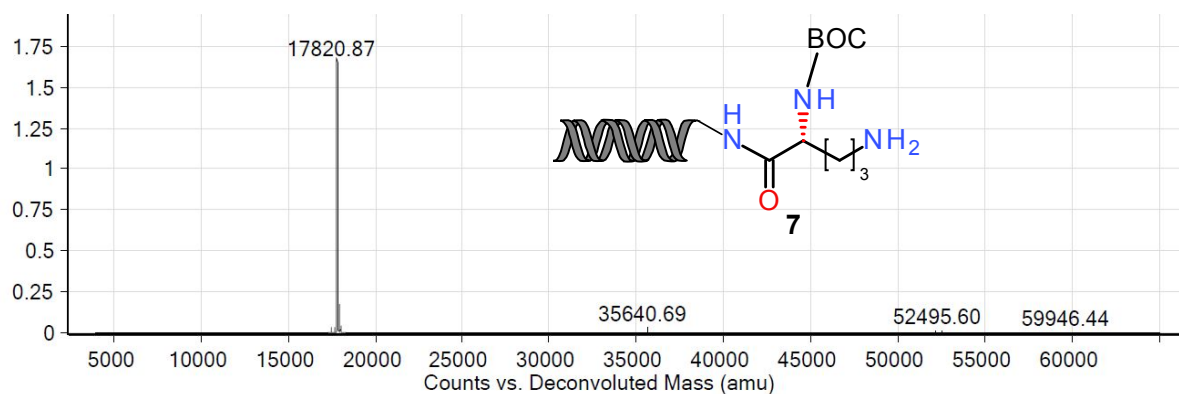

**Figure S48:** Deconvoluted mass spectrum of compound **7**, expected: 17820; observed: 17820

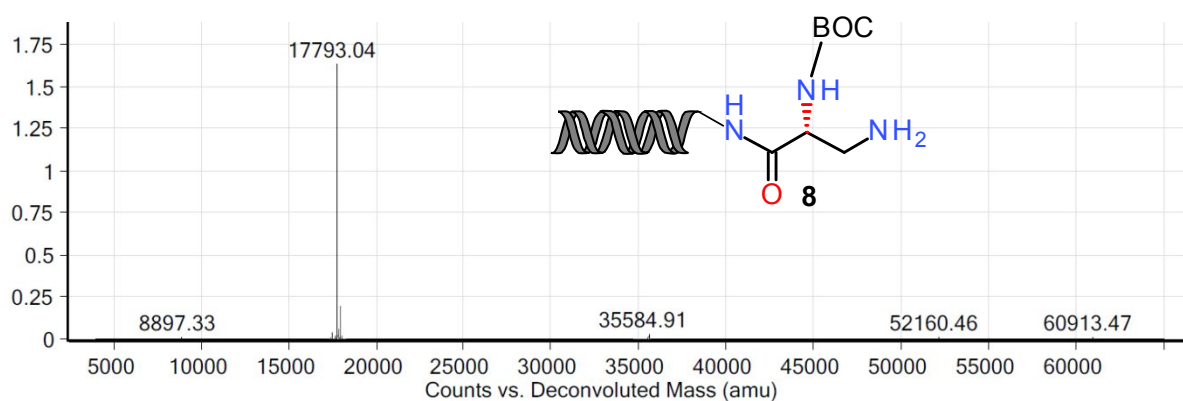

**Figure S49:** Deconvoluted mass spectrum of compound **8**, expected: 17792; observed: 17793

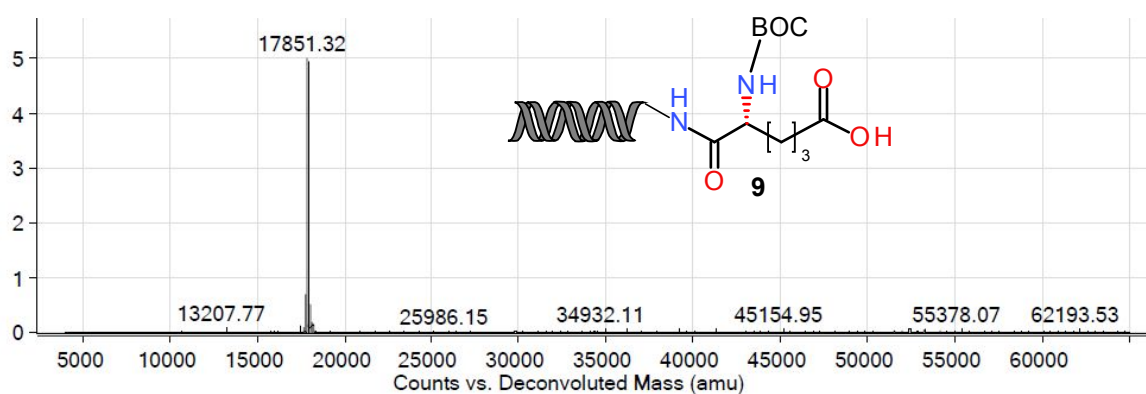

**Figure S50:** Deconvoluted mass spectrum of compound **9**, expected: 17849; observed: 17851

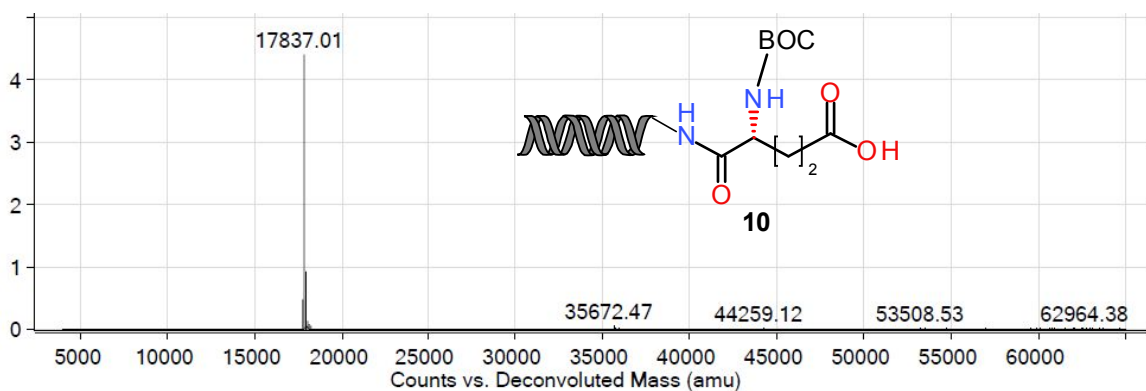

**Figure S51:** Deconvoluted mass spectrum of compound **10**, expected: 17835; observed: 17837

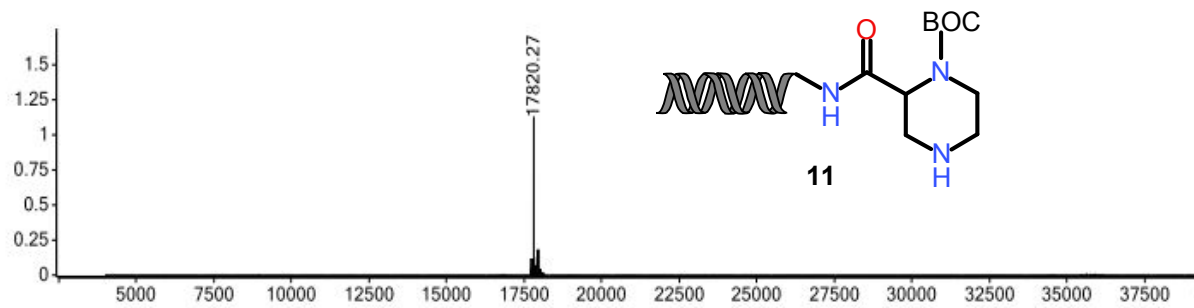

**Figure S52:** Deconvoluted mass spectrum of compound **11**, expected: 17818; observed: 17820

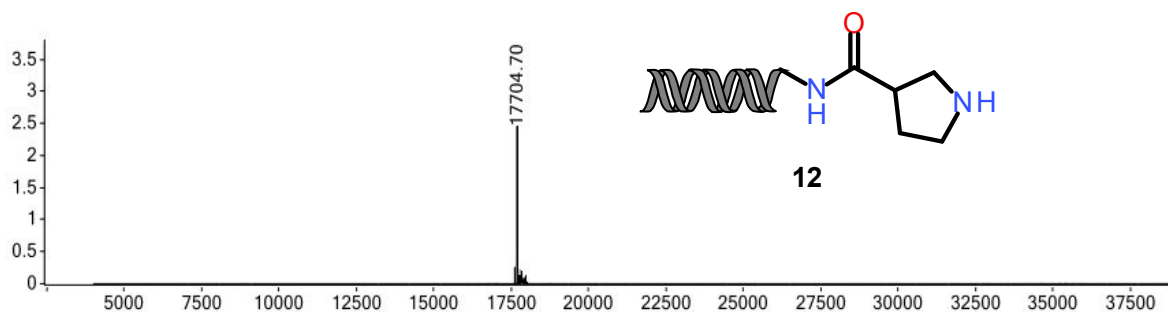

**Figure S53:** Deconvoluted mass spectrum of compound **12**, expected: 17703; observed: 17704



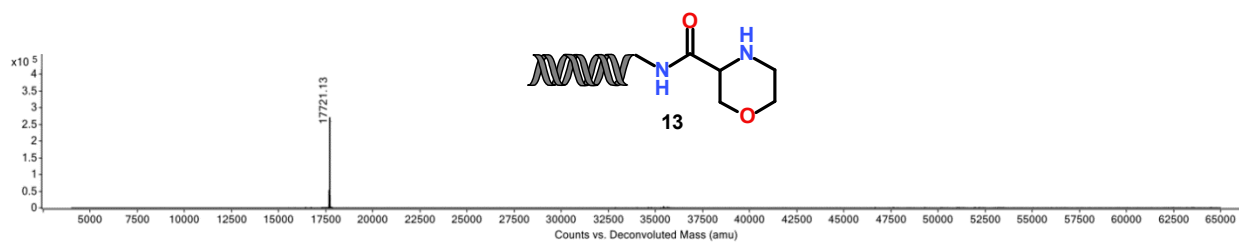

**Figure S54:** Deconvoluted mass spectrum of compound **13**, expected: 17719; observed: 17721

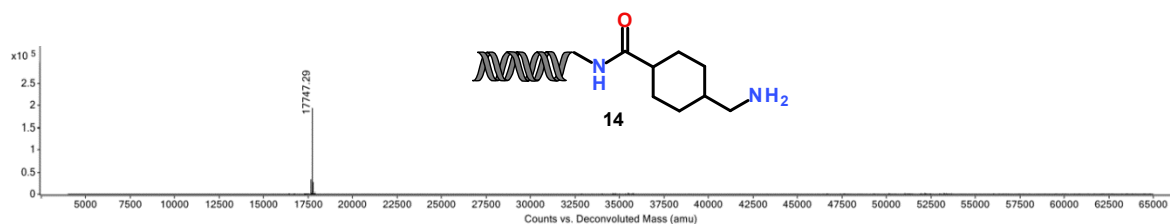

**Figure S55:** Deconvoluted mass spectrum of compound **14**, expected: 17745; observed: 17747

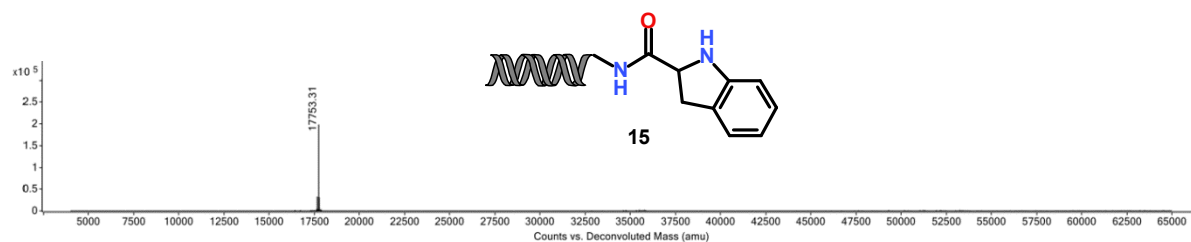

**Figure S56:** Deconvoluted mass spectrum of compound **15**, expected: 17751; observed: 17753

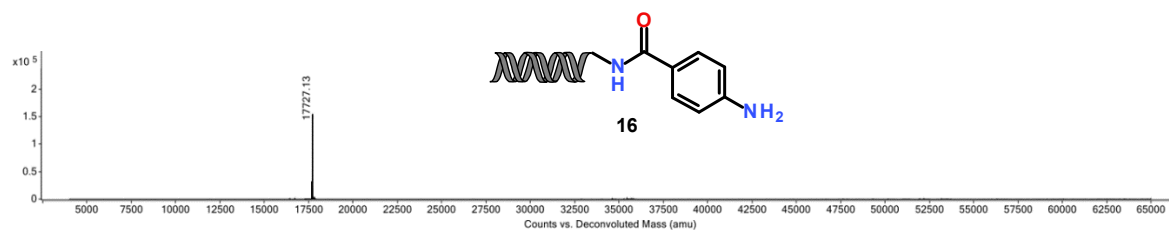

**Figure S57:** Deconvoluted mass spectrum of compound **16**, expected: 17725; observed: 17727

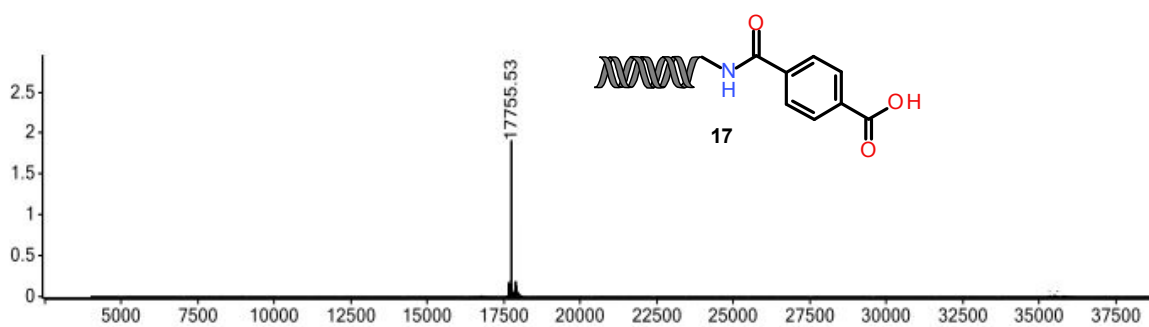

**Figure S58:** Deconvoluted mass spectrum of compound **17**, expected: 17754; observed: 17755

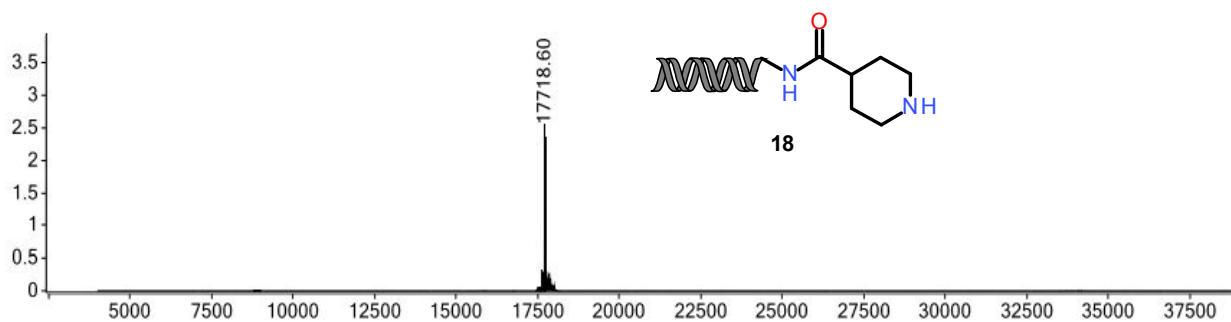

**Figure S59:** Deconvoluted mass spectrum of compound **18**, expected: 17716; observed: 17718

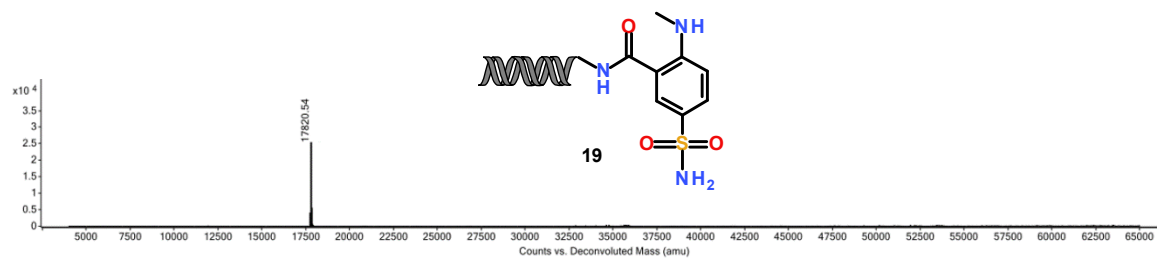

**Figure S60:** Deconvoluted mass spectrum of compound **19**, expected: 17818; observed: 17820

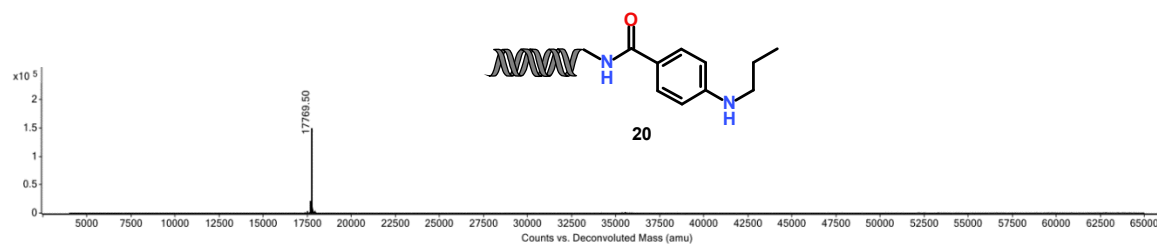

**Figure S61:** Deconvoluted mass spectrum of compound **20**, expected: 17767; observed: 17769

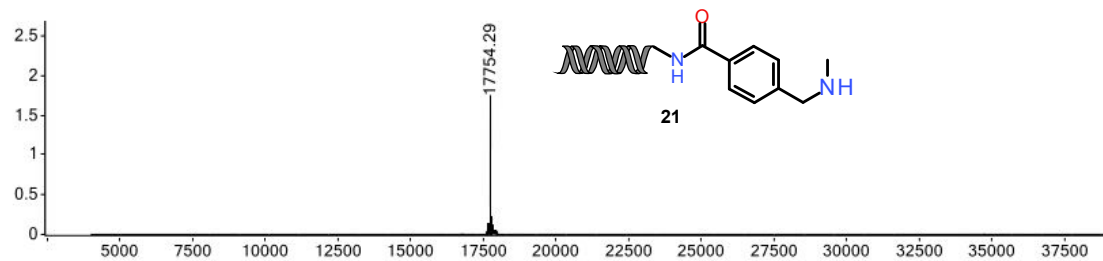

**Figure S62:** Deconvoluted mass spectrum of compound **21**, expected: 17753; observed: 17754

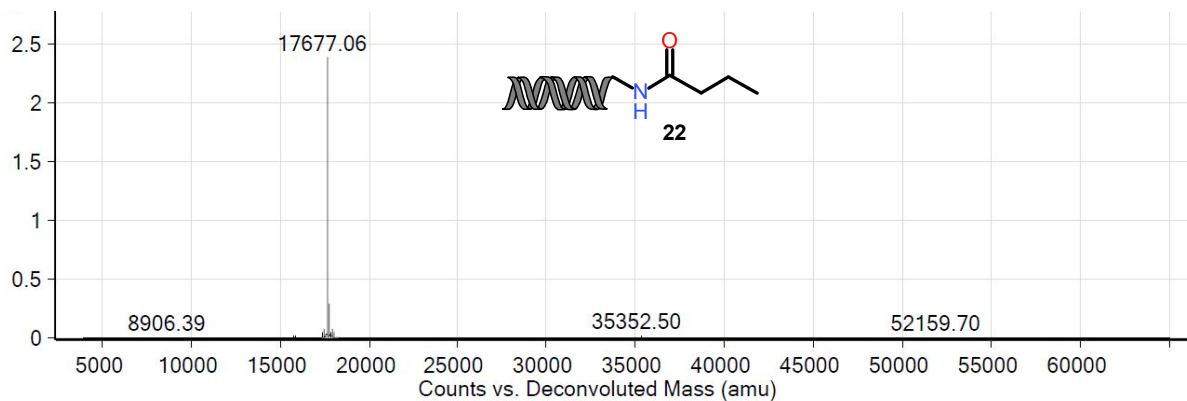

**Figure S63:** Deconvoluted mass spectrum of compound **22**, expected: 17676; observed: 17677

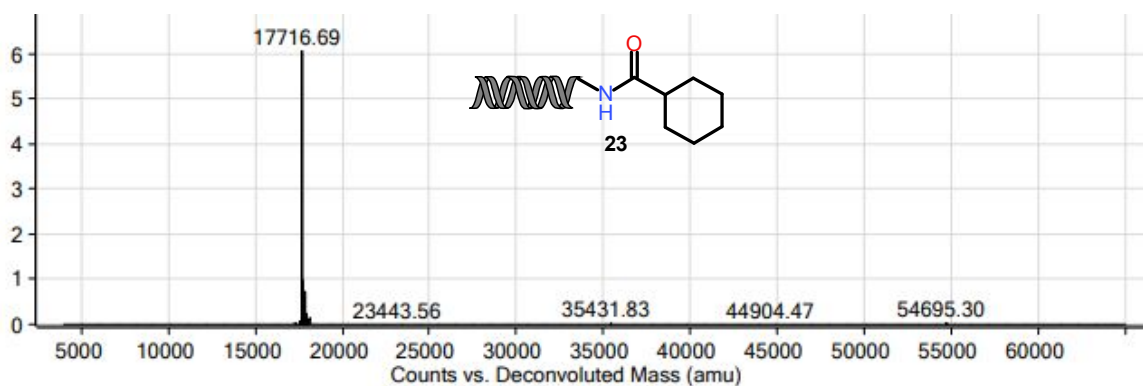

**Figure S64:** Deconvoluted mass spectrum of compound **23**, expected: 17716; observed: 17716

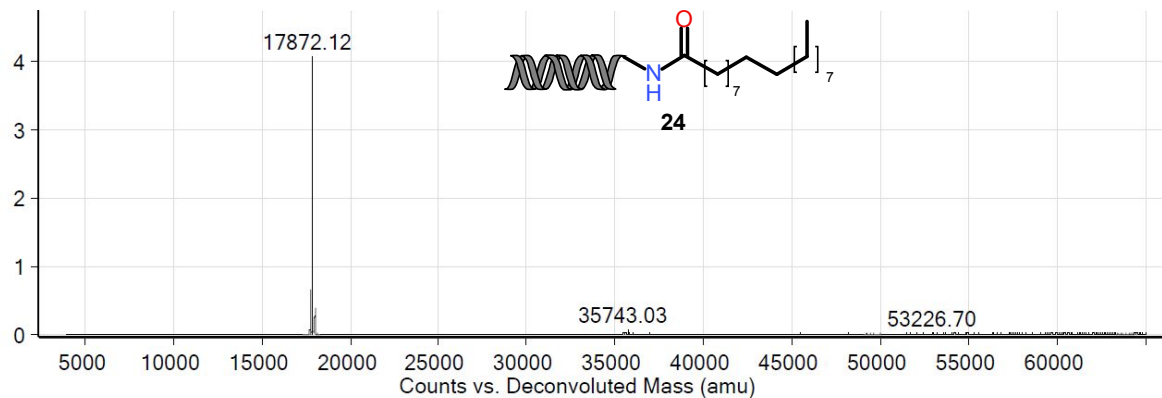

**Figure S65:** Deconvoluted mass spectrum of compound **24**, expected: 17872; observed: 17872

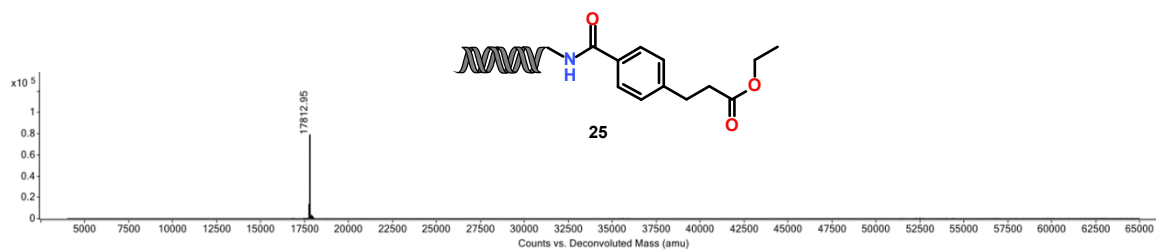

**Figure S66:** Deconvoluted mass spectrum of compound **25**, expected: 17810; observed: 17812

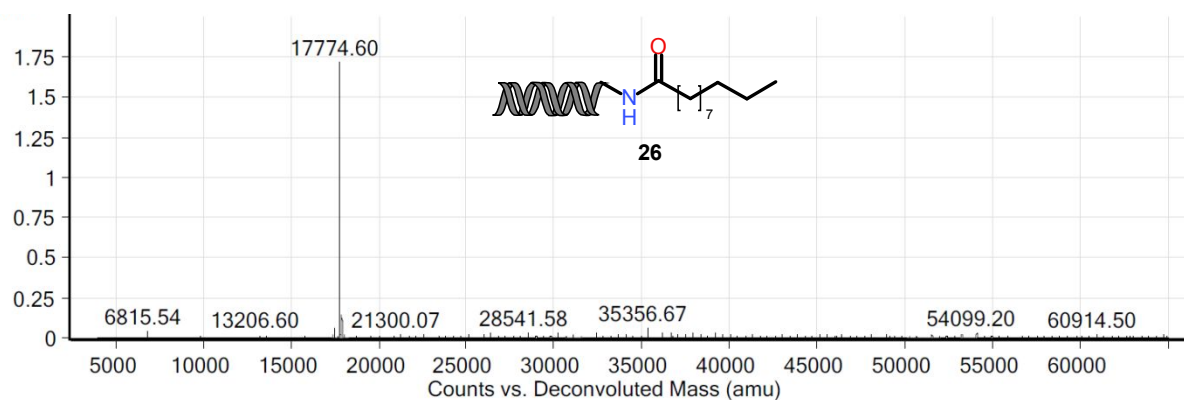

**Figure S67:** Deconvoluted mass spectrum of compound **26**, expected: 17774; observed: 17774

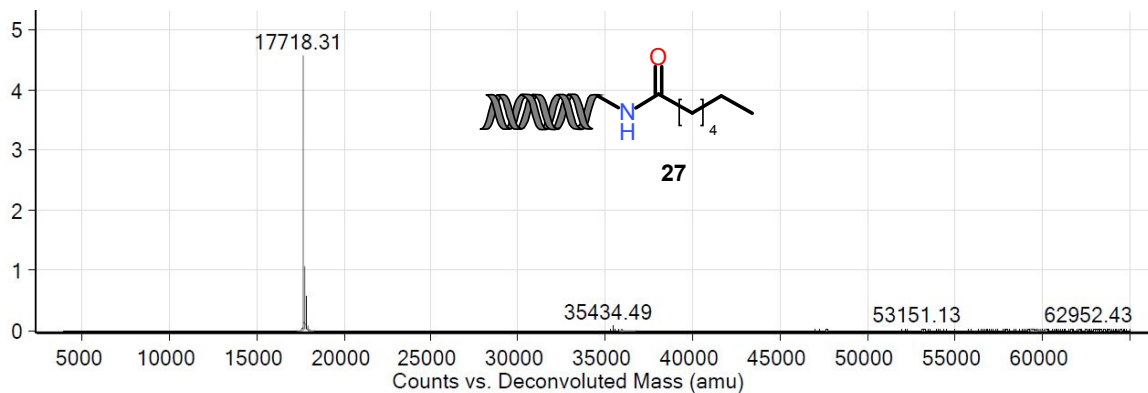

**Figure S68:** Deconvoluted mass spectrum of compound **27**, expected: 17718; observed: 17718

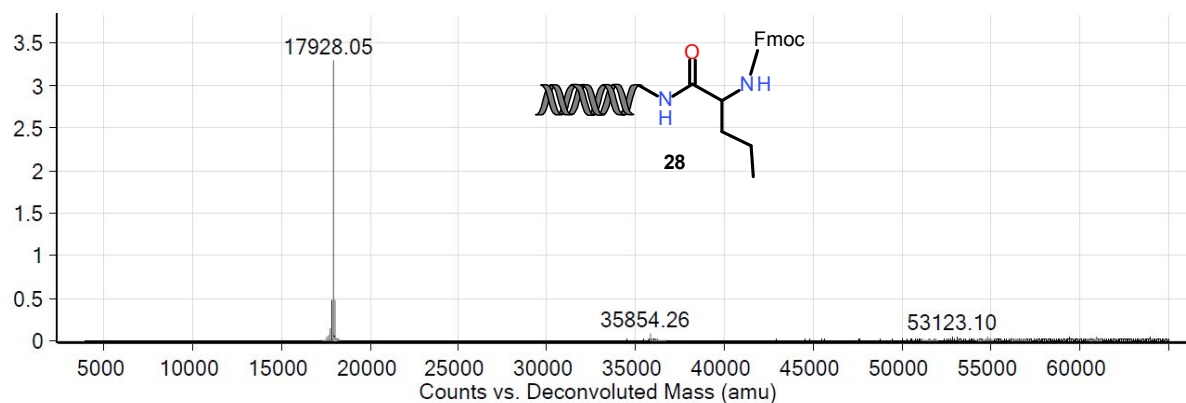

**Figure S69:** Deconvoluted mass spectrum of compound **28**, expected: 17927; observed: 17928

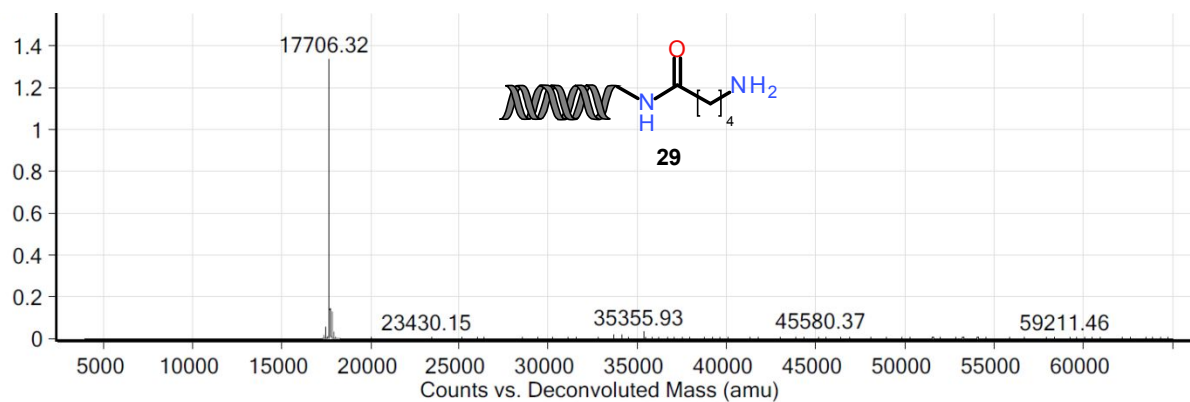

**Figure S70:** Deconvoluted mass spectrum of compound **29**, expected: 17705; observed: 17706

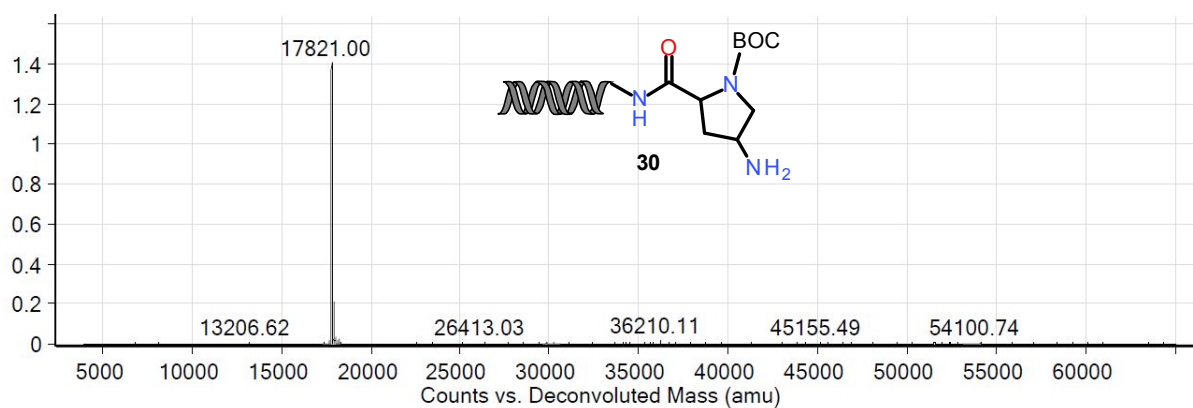

**Figure S71:** Deconvoluted mass spectrum of compound **30**, expected: 17818; observed: 17821

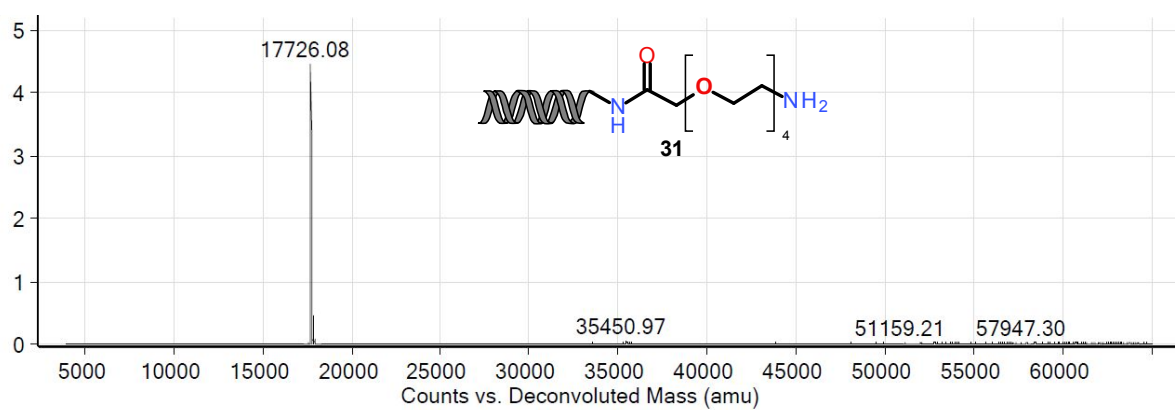

**Figure S72:** Deconvoluted mass spectrum of compound **31**, expected: 17725; observed: 17726

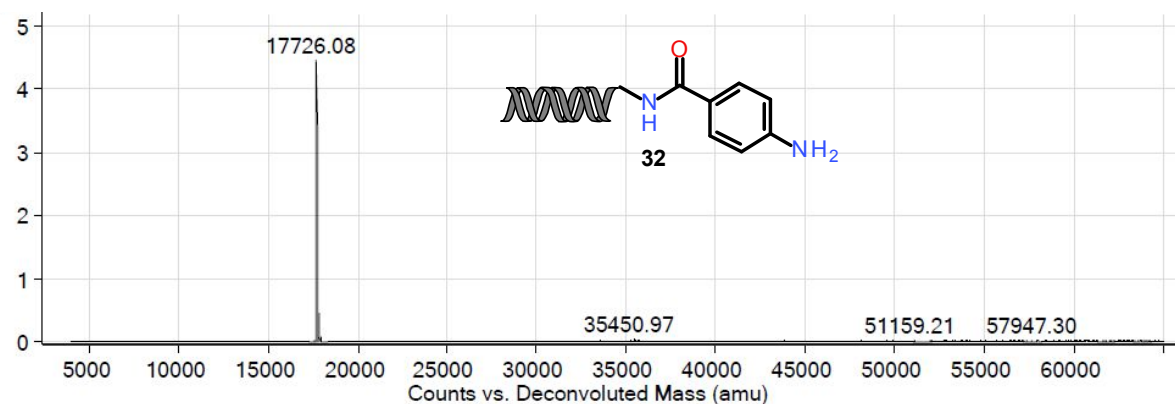

**Figure S73:** Deconvoluted mass spectrum of compound **32**, expected: 17725; observed: 17726

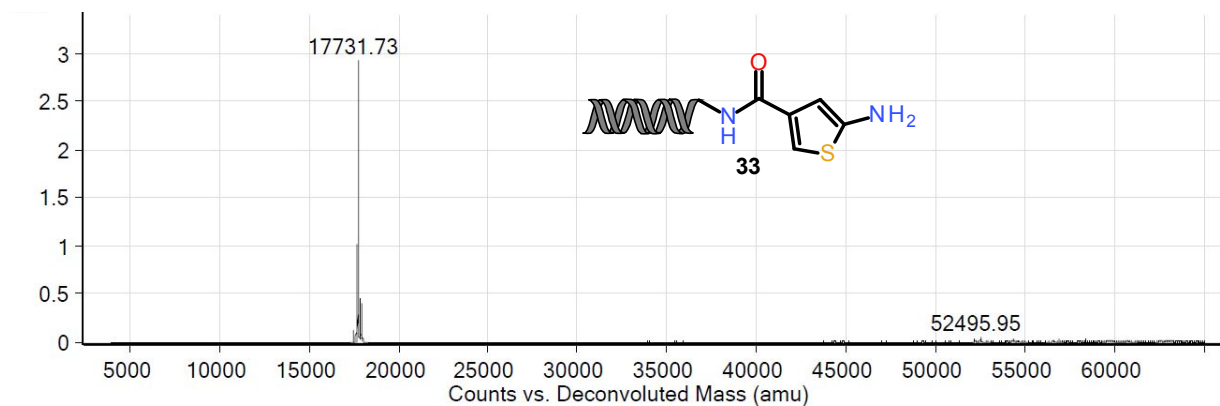

**Figure S74:** Deconvoluted mass spectrum of compound **33**, expected: 17731; observed: 17731



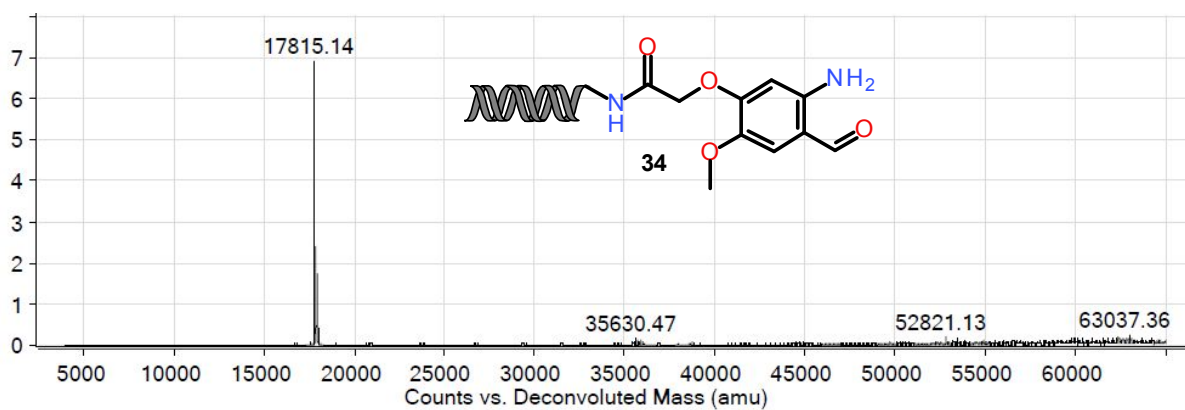

**Figure S75:** Deconvoluted mass spectrum of compound **34**, expected: 17813; observed: 17815

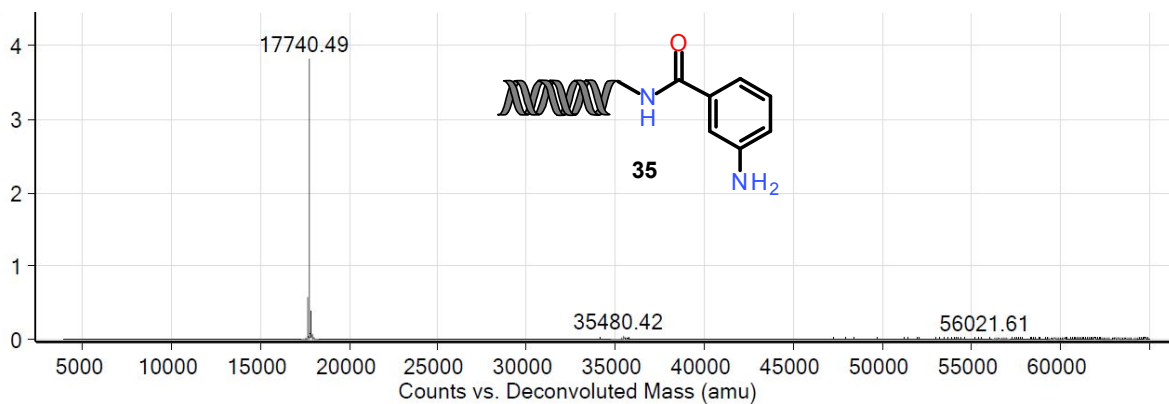

**Figure S76:** Deconvoluted mass spectrum of compound **35**, expected: 17739; observed: 17740

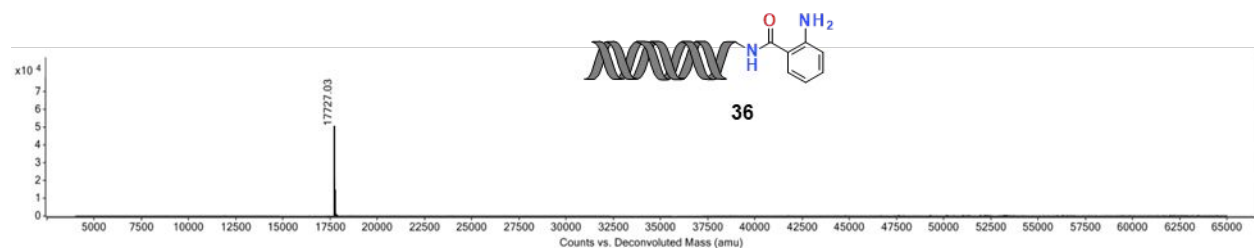

**Figure S77:** Deconvoluted mass spectrum of compound **36**, expected: 17760; observed: 17727.

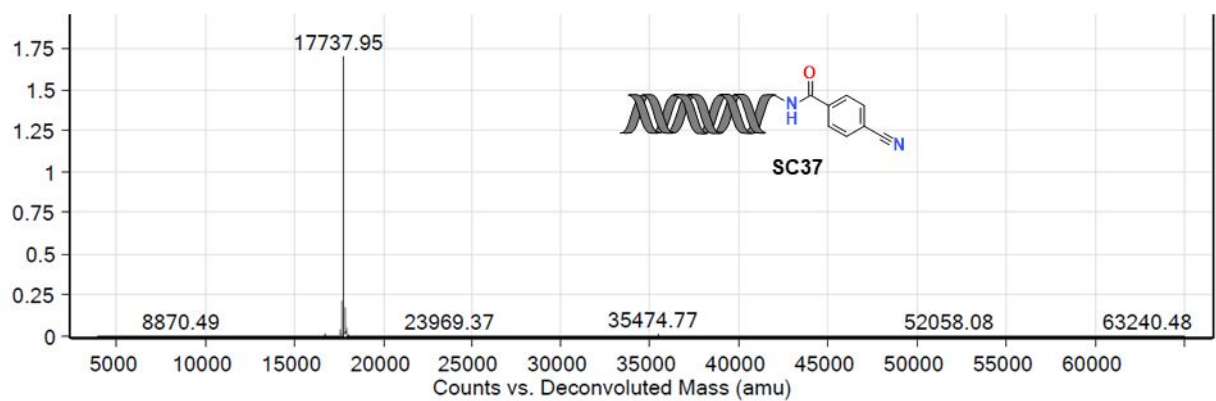

**Figure S78:** Deconvoluted mass spectrum of compound **37**, expected: 17739; observed: 17737 (SM, **SC37**). No nitrile reduction observed.

**V. General procedure for 3-cycle library dummy synthesis and representative LCMS of intermediates 38 to 42**

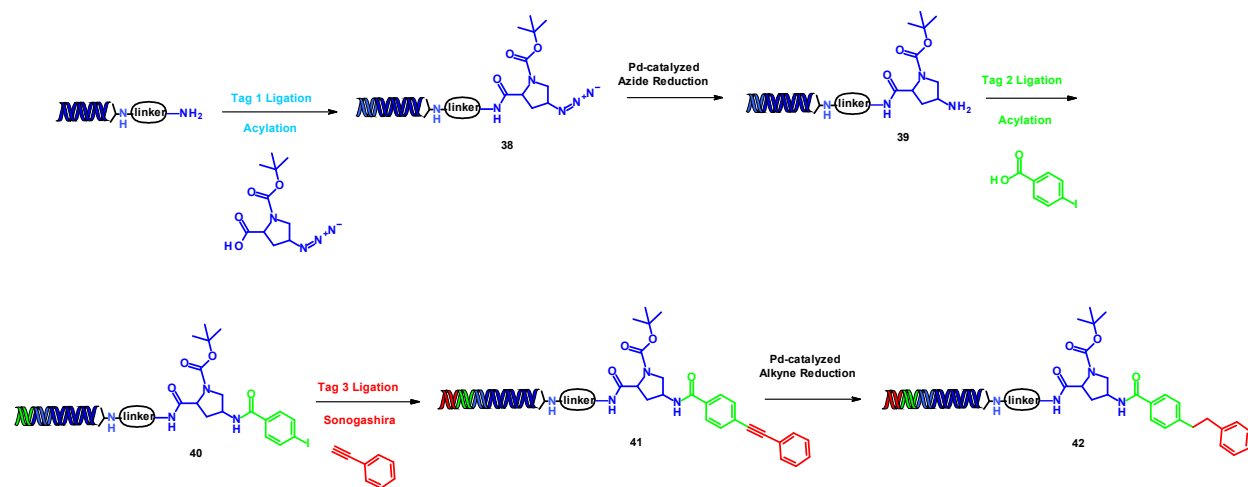

**Figure S79:** 3-cycle library dummy synthesis

### Dummy Cycle 1: Tag 1 ligation, Acylation and Pd hydrogenation steps (39)

**Tag 1 ligation:** To a solution of AOP-HP-Primer-NH<sub>2</sub> (200 nmol, in 514  $\mu$ L of water) were added Tag 1 (240 nmol in 198  $\mu$ L of water, 1.2 equiv) and a premixture formed by 10X T4 DNA Ligase Buffer (80  $\mu$ L) and T4 DNA LIGASE (8  $\mu$ L). The mixture was slightly vortexed and incubated at 16 °C, without stirring, for 16 h. The crude material was precipitated by addition of 10% volume stock solution of 5 M NaCl in water and 3 times volume of cold EtOH. The mixture was kept in the freezer for 1 h and then it was centrifuged for 45 min. The supernatant was discarded and the residue was dried under N<sub>2</sub> at 37 °C. Then, it was used in the next step synthesis without further purification.

**Acylation:** To a solution of previous Tag 1 ligated AOP-HP-Primer-NH<sub>2</sub> in borate buffer 0.5 M pH 9.4 (123 nmol, 1 mM) were added the corresponding carboxylic acid BOC-azido-proline (37  $\mu$ L, 200 mM in DMA, 60 equiv), followed by DMT-MM (18.5  $\mu$ L, 400 mM in water, 60 equiv). The reaction mixture was allowed to proceed at room temperature with shaking overnight. The crude material was precipitated by addition of 10% volume stock solution of 5 M NaCl in water and 3 times volume of cold EtOH. The mixture was kept in the freezer for 1 h and then it was centrifuged for 45 min. The supernatant was discarded and the residue was dried under N<sub>2</sub> at 37 °C. Then, it was used in the next step synthesis without further purification, to afford Tag1-AOP-HP-Primer-NH-Azidoproline derivative (**38**).

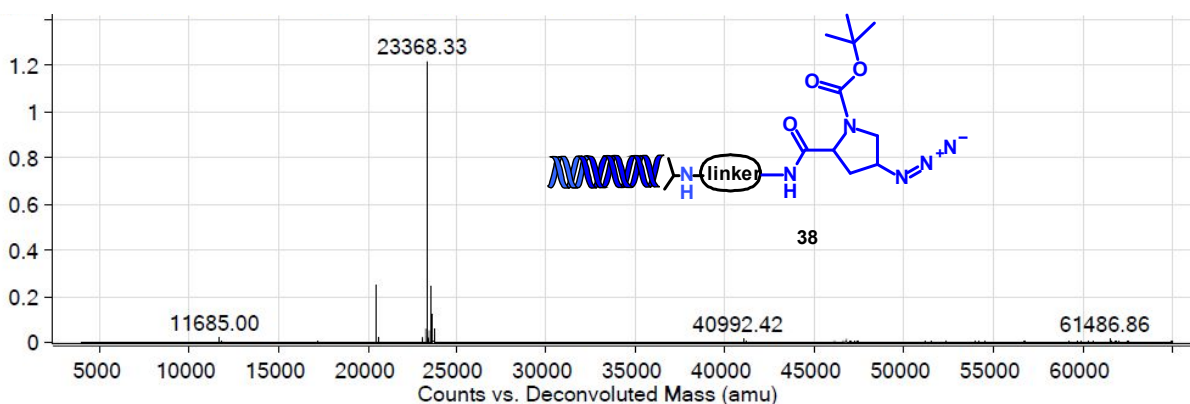

**Figure S80:** Deconvoluted mass spectrum of compound **38**, expected: 23365; observed: 23368

**Pd hydrogenation:** After acylation step, Tag1-AOP-HP-Primer-NH-Azidoproline was reduced to amine, following general procedure for hydrogenation (see general procedure, section IV, pag 18 of SI), to afford Tag1-AOP-HP-Primer-NH-amino-pyrrolidine derivative (**39**).

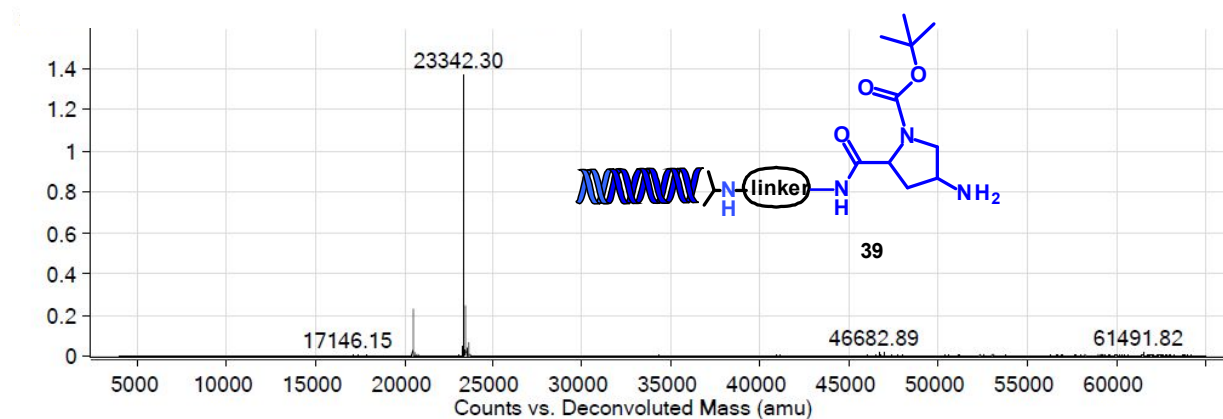

**Figure S81:** Deconvoluted mass spectrum of compound **39**, expected: 23339; observed: 23342

## Dummy Cycle 2: Tag 2 ligation and Acylation step (40)

**Tag 2 ligation:** To a solution of Tag1-AOP-HP-Primer-NH-amino-pyrrolidine (**39**) (108 nmol, in 344  $\mu$ L of water) were added Tag 2 (151.2 nmol in 47.6  $\mu$ L of water, 1.4 equiv) and a premixture formed by 10X T4 DNA Ligase Buffer (44  $\mu$ L) and T4 DNA LIGASE (4.4  $\mu$ L). The mixture was slightly vortexed and incubated at 16  $^{\circ}$ C, without stirring, for 16 h. The crude material was precipitated by addition of 10% volume stock solution of 5 M NaCl in water and 3 times volume of cold EtOH. The mixture was kept in the freezer for 1 h and then it was centrifuged for 45 min. The supernatant was discarded and the residue was dried under  $N_2$  at 37  $^{\circ}$ C. Then, it was used in the next step synthesis without further purification.

**Acylation:** To a solution of previous Tag 2 ligated Tag1-AOP-HP-Primer-NH-amino-pyrrolidine in borate buffer 0.5 M pH 9.4 (83 nmol, 1 mM) were added the corresponding carboxylic acid iodobenzoic acid (25  $\mu$ L, 200 mM in DMA, 60 equiv), followed by DMT-MM (12.5  $\mu$ L, 400 mM in water, 60 equiv). The reaction mixture was allowed to proceed at room temperature with shaking overnight. The reaction was precipitated by addition of 10% volume stock solution of 5 M NaCl in water and 3 times volume of cold EtOH. The mixture was kept in the freezer for 1 h and then it was centrifuged for 45 min. The supernatant was discarded and the residue was dried under  $N_2$  at 37  $^{\circ}$ C. Then, the pellet was redissolved in water and centrifuged through a YM10K centrifugal tube (Amicon) at 4000 rpm for 30 min. The sample was collected and its concentration was measured by Nanodrop, to afford Tag1-Tag2-AOP-HP-Primer-NH-iodobenzoyl-amino-pyrrolidine derivative (**40**).

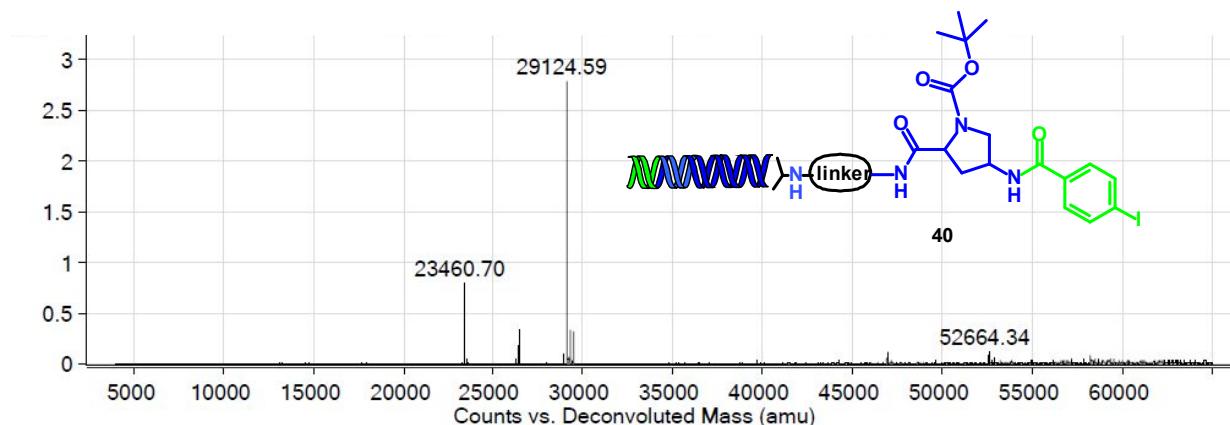

**Figure S82:** Deconvoluted mass spectrum of compound **40**, expected: 29121; observed: 29124

### Dummy Cycle 3: Tag 3 ligation, Sonogashira and Pd hydrogenation steps (42)

**Tag 3 ligation:** To a solution of Tag1-Tag2-AOP-HP-Primer-NH-iodobenzoyl-amino-pyrrolidine derivative (**40**) (45 nmol, in 90  $\mu$ L of water) were added Tag 3 (72 nmol in 79.1  $\mu$ L of water, 1.6 equiv) and a premixture formed by 10X T4 DNA Ligase Buffer (19  $\mu$ L) and T4 DNA LIGASE (1.9  $\mu$ L). The mixture was slightly vortexed and incubated at 16  $^{\circ}$ C, without stirring, for 16 h. The crude material was precipitated by addition of 10% volume stock solution of 5 M NaCl in water and 3 times volume of cold EtOH. The mixture was kept in the freezer for 1 h and then it was centrifuged for 45 min. The supernatant was discarded and the residue was dried under  $N_2$  at 37  $^{\circ}$ C. Then, it was used in the next step synthesis without further purification.

**Sonogashira:** To a solution of previous Tag 3 ligated Tag1-Tag2-AOP-HP-Primer-NH-iodobenzoyl-amino-pyrrolidine in water (20 nmol, 1 mM) were added the corresponding phenylacetylene (6  $\mu$ L, 200 mM in DMA, 60 equiv), followed by pyrrolidine (1  $\mu$ L, 600 equiv, net) and tetrakis(triphenylphosphine)palladium (0) (10  $\mu$ L, 10 mM in DMA, 5 equiv). The reaction mixture was allowed to proceed at 65  $^{\circ}$ C with shaking for 3 h. Then, to the crude material was added L-Cysteine (Pd scavenger, see L-Cysteine treatment in Section IV, page 18) and precipitated by addition of 10% volume stock solution of 5 M NaCl in water and 3 times volume of cold EtOH. The mixture was kept in the freezer for 1 h and then it was centrifuged for 45 min. The supernatant was discarded and the residue was dried under  $N_2$  at 37  $^{\circ}$ C. Then, it was used in the next step synthesis without further purification, to afford Tag1-Tag2-Tag3-AOP-HP-Primer-NH-phenylethynyl-benzoyl-amino-pyrrolidine derivative (**41**).

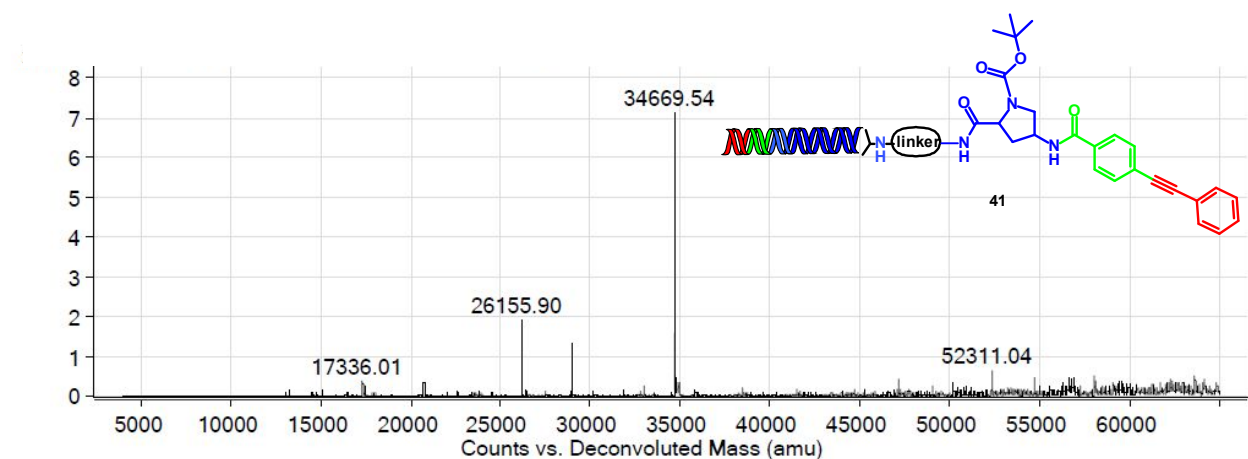

**Figure S83:** Deconvoluted mass spectrum of compound **41**, expected: 34668; observed: 34669

**Pd hydrogenation:** After Sonogashira step, Tag1-Tag2-Tag3-AOP-HP-Primer-NH-phenylethynyl-benzoyl-amino-pyrrolidine (**41**) was reduced to alkane, following the general procedure for hydrogenation (Section IV, page 18), to afford Tag1-Tag2-Tag3-AOP-HP-Primer-NH-phenylethyl-benzoyl-amino-pyrrolidine derivative (**42**).

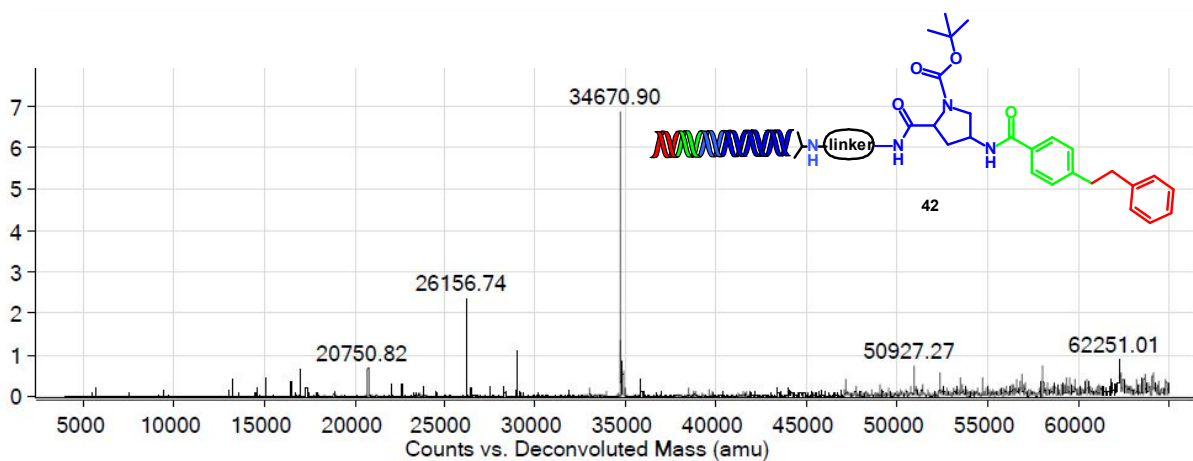

**Figure S84:** Deconvoluted mass spectrum of compound **42**, expected: 34672; observed: 34671



## VI. DNA Damage Evaluation: Assessment of DNA degradation using Quantitative PCR

We generated a DNA sequence containing the Headpiece, Primer, three DNA tags and Closing Primer. This sequence was purified and referenced as Starting Material (SM) to assess the DNA degradation under the different chemistry conditions.

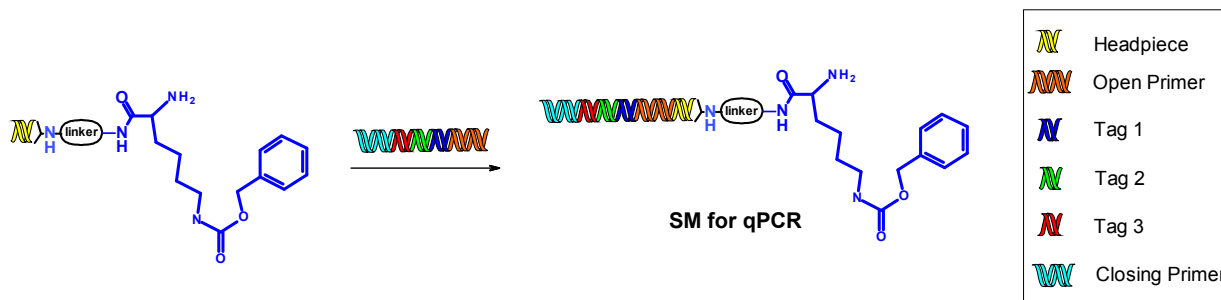

**Figure S85:** Synthesis of SM for qPCR

The sequence was divided in 5 wells of a 96 well plate with 5 nmol (5  $\mu$ l at 1 mM concentration) of DNA SM per well. The total volume with the reagents was 14  $\mu$ l of reaction, the volume of the sample with no chemistry was corrected to a final volume of 14  $\mu$ l with ddH<sub>2</sub>O. The chemistry conditions were as follows:

1. SM only (No chemistry control).
2. SM, 5 equivalents of Pd(OAc)<sub>2</sub> and 40 equivalents of NaBH<sub>4</sub>.
3. SM, 5 equivalents of Pd(OAc)<sub>2</sub> and 40 equivalents of NaBH<sub>4</sub> and 300 equivalents of L-Cysteine.
4. SM, 20 equivalents of Pd(OAc)<sub>2</sub> and 160 equivalents of NaBH<sub>4</sub>.
5. SM, 20 equivalents of Pd(OAc)<sub>2</sub> and 160 equivalents of NaBH<sub>4</sub> and 300 equivalents of L-Cysteine.

All the samples were incubated 60 minutes at 30 °C. After incubation, the samples were purified by ethanol precipitation adding 10% (V/V) NaCl 5M and 2,5 volumes of cold ethanol and centrifugated for 1 hour at 4 °C. The supernatant was removed, the pellets were dried under nitrogen flow and once the samples were completely dry, the five residues were resuspended in 50  $\mu$ l of ddH<sub>2</sub>O.

The samples were diluted 100.000 times and subjected to Quantitative PCR analysis using triplicates for each condition using a StepOnePlus Real-Time PCR Systems.

For each well, 5  $\mu$ l of Fast SYBR Green Master MIX (2X) (Thermo-Fisher), 1  $\mu$ l of the Forward Primer (5  $\mu$ M), 1  $\mu$ l of the Reverse Primer (5  $\mu$ M), 2  $\mu$ l of ddH<sub>2</sub>O and 1  $\mu$ l of diluted sample was used.

qPCR Cycling Conditions (fast mode):

| Step                       | Temperature | Time  | Cycles |
|----------------------------|-------------|-------|--------|
| <b>UDG activación</b>      | 50°C        | 2min  | 1      |
| <b>Polymerase</b>          | 95°C        | 2min  | 1      |
| <b>Denaturation</b>        | 95°C        | 1sec  | 40     |
| <b>Annealing/extension</b> | 60°C        | 30sec | 40     |

**Figure S86:** qPCR Cycling Conditions

The results were analyzed using the StepOne Software v2.3 and the Cycle Threshold (Ct) of each sample, the Ct Mean and Standard Deviation (Ct SD) for the triplicates were calculated by the software. To calculate the percentage of degradation, the sample set as no chemistry control was used as reference. The difference between the Ct of the sample of interest and the reference (sample 1, No Chemistry control) was calculated and transformed to the power of 2 of the -dCT to set the percentage of sample remaining.

| Well     | Target Name                                               | Ct Mean | Ct SD | dCT (Ct Target - Ct Reference) | 2 <sup>-dCT</sup> | Percentage |
|----------|-----------------------------------------------------------|---------|-------|--------------------------------|-------------------|------------|
| <b>1</b> | <b>SM only</b>                                            | 11.87   | 0.056 | 0                              | 1                 | 100        |
| <b>2</b> | <b>SM + Pd 5 equiv + 40 equiv BoroH</b>                   | 11.91   | 0.018 | 0.038122                       | 0.973922          | 97.4       |
| <b>3</b> | <b>SM + Pd 20 equiv + 160 equiv BoroH</b>                 | 11.9    | 0.082 | 0.028113                       | 0.980702          | 98.1       |
| <b>4</b> | <b>SM + Pd 5 equiv + 40 equiv BoroH + 300 equiv Cys</b>   | 11.93   | 0.014 | 0.062666                       | 0.957493          | 95.7       |
| <b>5</b> | <b>SM + Pd 20 equiv + 160 equiv BoroH + 300 equiv Cys</b> | 11.92   | 0.033 | 0.049963                       | 0.965961          | 96.6       |

**Figure S87:** Results of qPCR

As assessed by qPCR there is very low (<5%) degradation of the samples under the experimental conditions used in comparison with the sample set as reference.

## VII. Azide reduction methods comparison

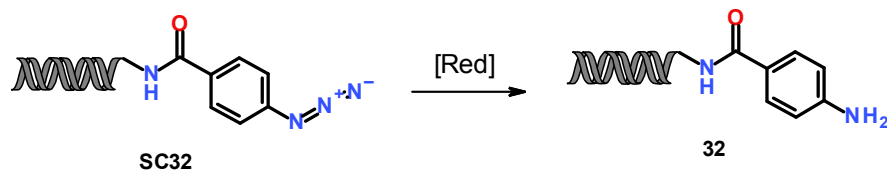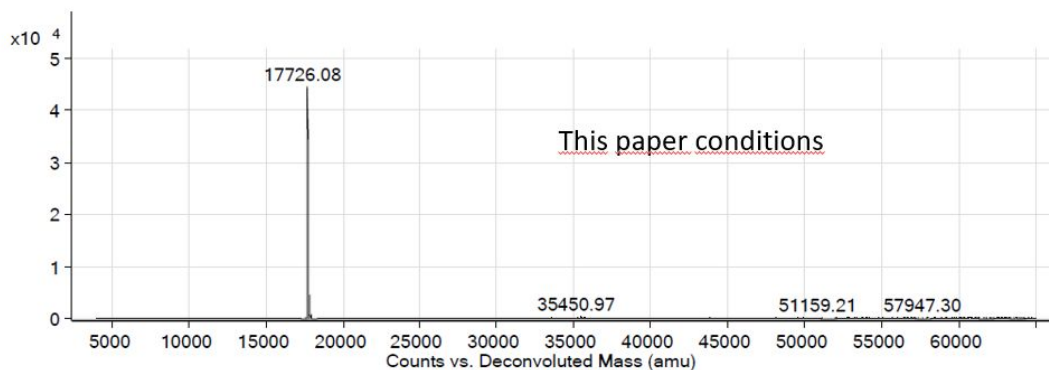

**Figure S88:** Deconvoluted mass spectrum of compound **32**, expected: 17725; observed: 17726. Azide reduction under the described conditions in this paper.

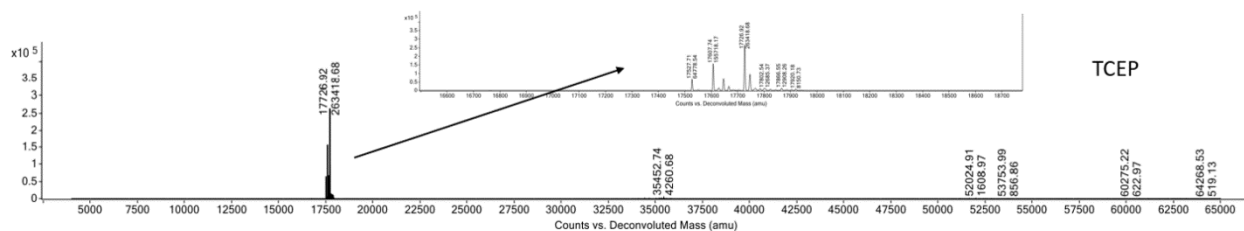

**Figure S89:** Deconvoluted mass spectrum of compound **32**, expected: 17725; observed: 17726. Azide reduction under TCEP conditions.

## VIII. Nitro reduction methods comparison

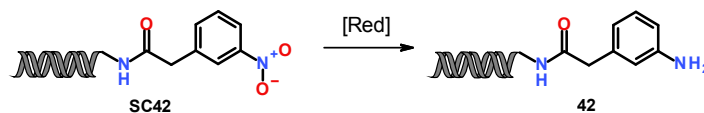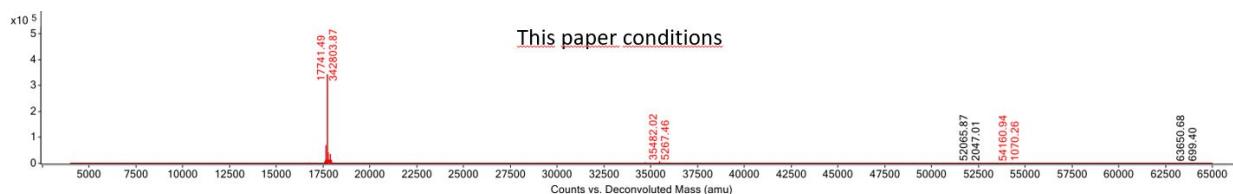

**Figure S90:** Deconvoluted mass spectrum of compound **42**, expected: 17739; observed: 17741. Nitro reduction under the conditions described in this paper: .

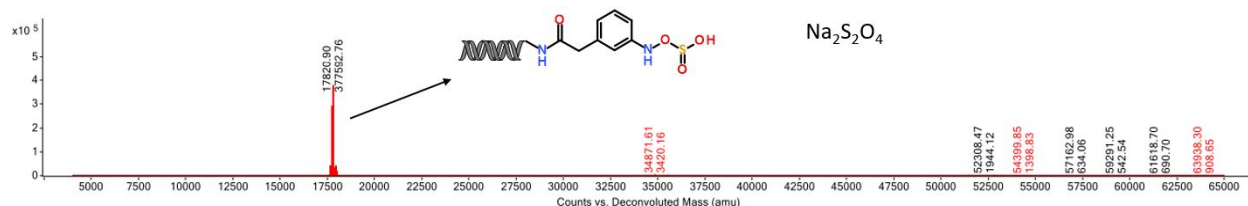

**Figure S91:** Deconvoluted mass spectrum of compound **42**, expected: 17739; observed: 17820 (hydrogen sulfite intermediate). Nitro reduction with  $\text{Na}_2\text{S}_2\text{O}_4$ .

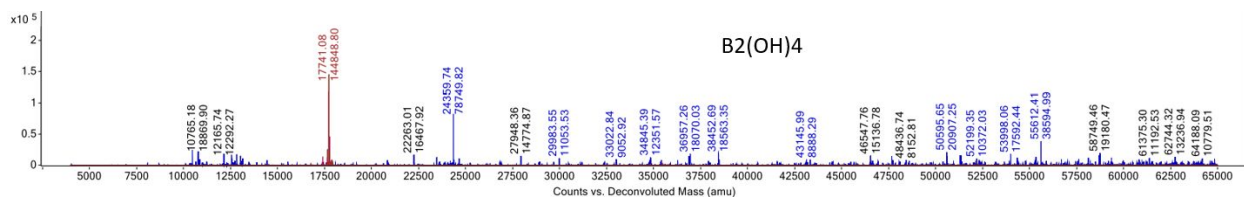

**Figure S92:** Deconvoluted mass spectrum of compound **42**, expected: 17739; observed: 17741. Nitro reduction with  $\text{B}_2(\text{OH})_4$ .

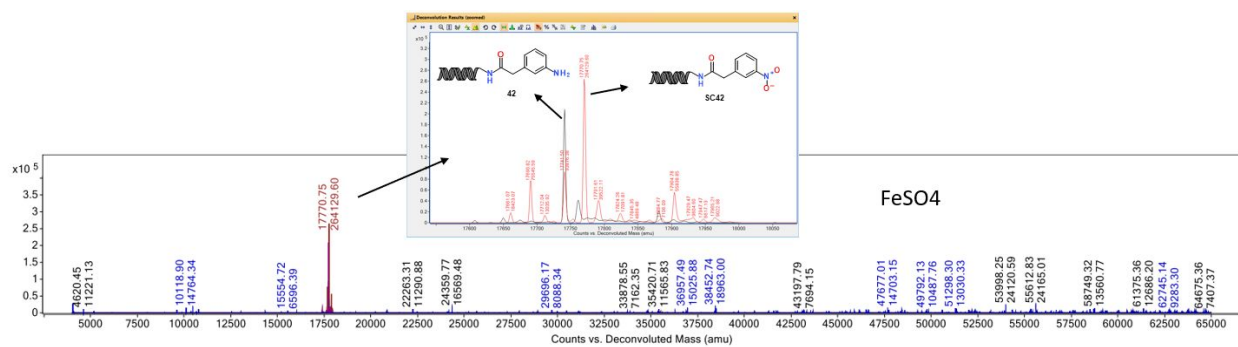

**Figure S93:** Deconvoluted mass spectrum of compound **42**, expected: 17739; observed: 17741 and 17770 (SM, **SC42**). Nitro reduction with FeSO<sub>4</sub>.

## IX. N-Alloc deprotection methods comparison

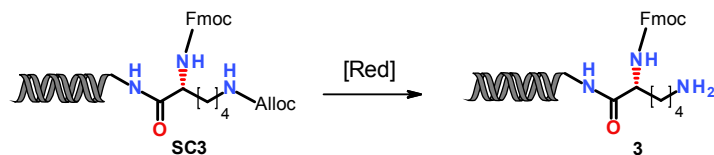

- **This paper conditions:** 1 equiv. of **SC3** (1.0 mM in H<sub>2</sub>O), 40 equiv. of NaBH<sub>4</sub> (400 mM in NMP), 5 equiv. of Pd(OAc)<sub>2</sub> (50 mM in DMA), rt, 1h. Desired deprotected product **3** obtained.

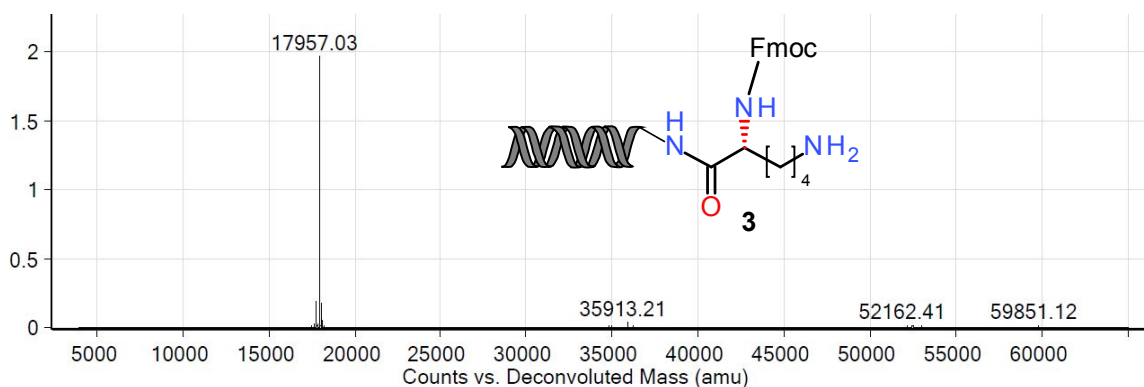

**Figure S96:** Deconvoluted mass spectrum of compound **3**, expected: 17956; observed: 17957

- **Satz conditions:** 1 equiv. of **SC3** (1.0 mM in H<sub>2</sub>O), 10 equiv. of NaBH<sub>4</sub> (200 mM in ACN), 10 equiv. of Pd(PPh<sub>3</sub>)<sub>4</sub> (10 mM in DMA), rt, 2h. Desired deprotected product **3** + unknown cpd obtained.

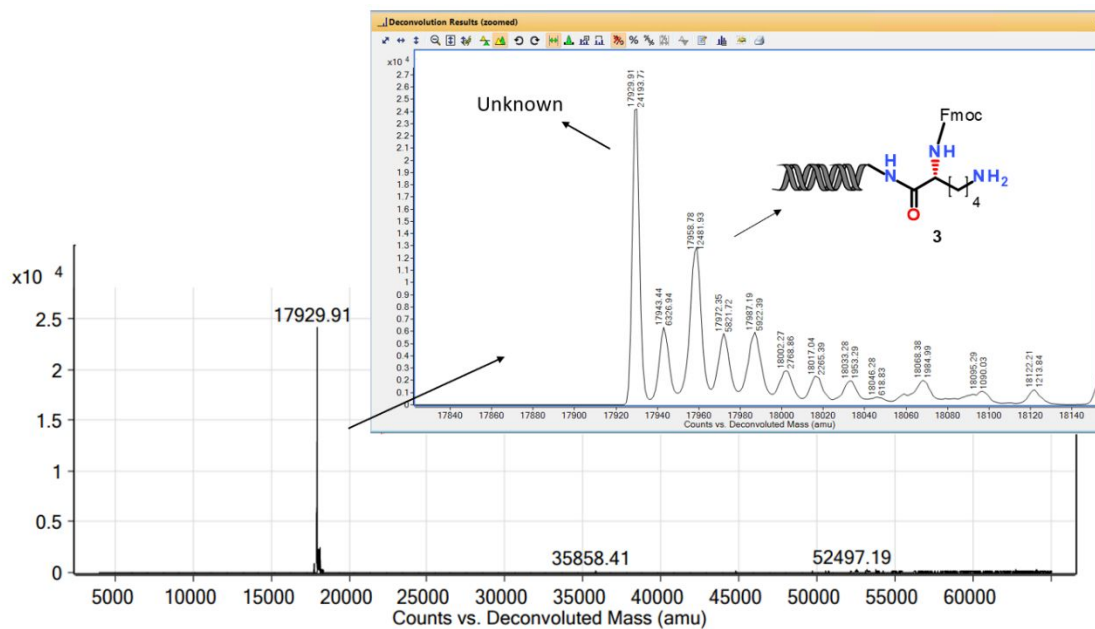

**Figure S97:** Deconvoluted mass spectrum of compound **3**, expected: 17956; observed: 17958 + 17929 (unknown compound).

## X. N-Cbz deprotection methods comparison

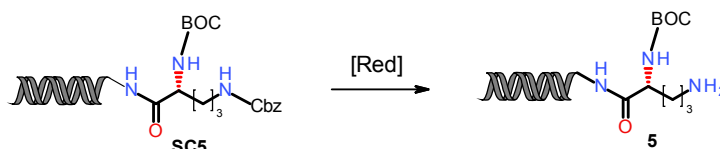

- **This paper conditions:** 1 equiv. of **SC5** (1.0 mM in H<sub>2</sub>O), 40 equiv. of NaBH<sub>4</sub> (400 mM in NMP), 5 equiv. of Pd(OAc)<sub>2</sub> (50 mM in DMA), rt, 1h. Desired deprotected product obtained.

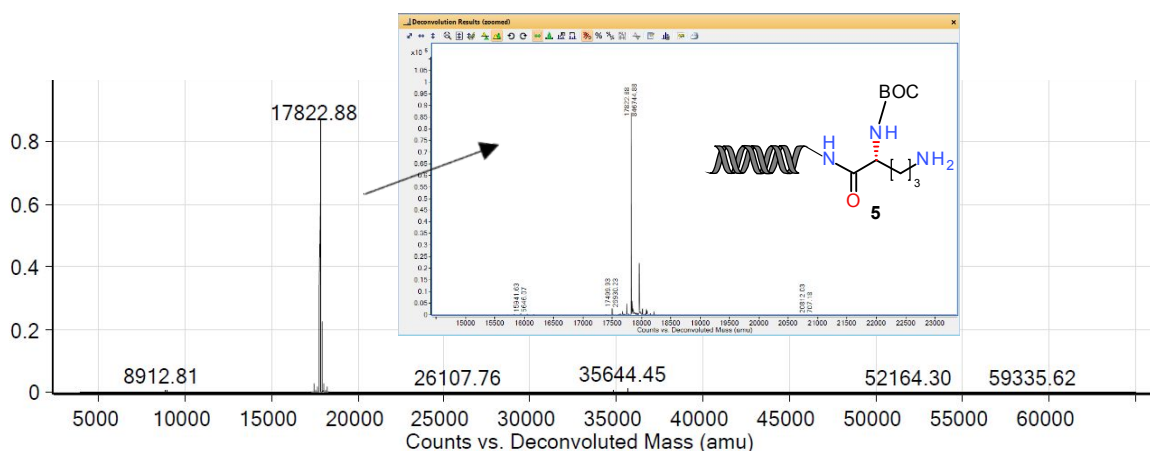

Figure S94: Deconvoluted mass spectrum of compound **5**, expected: 17820; observed: 17822.

- **Satz conditions:** 1 equiv. of **SC5** (1.0 mM in H<sub>2</sub>O), 10 equiv. of NaBH<sub>4</sub> (200 mM in ACN), 10 equiv. of Pd(PPh<sub>3</sub>)<sub>4</sub> (10 mM in DMA), rt, 2h. Mainly SM **SC5** obtained.

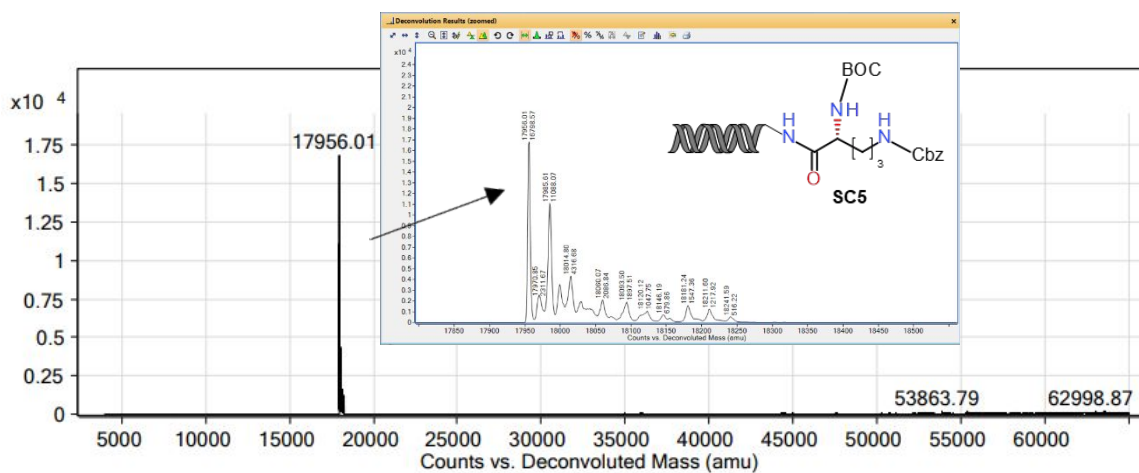

Figure S95: Deconvoluted mass spectrum. Expected product: 17820; observed: 17956 (SM, **SC5**).
